# Supplementary material for: Roux-en-Y Gastric Bypass Reduces Preprandial Appetite and Energy Intake Without Altering Relative Macronutrient Intake
Source: Research Square preprint supplement (doi:10.21203/rs.3.rs-6018162/v1), 2025-10-31
Supplement: Supplementary file 1 [file c0804eaf7d91acc1faac3ccb.docx]

**Supplementary Information**

**Supplementary Note 1**

**Selection of the study stimuli**

The four study stimuli (referred to as high-fat/low-sucrose, high-fat/high-sucrose, low-fat/ high-sucrose, and low-fat/low-sucrose “bottles”) were tested each with three different proportions of the ingredients (cow milk, cow cream, sucrose, and maltodextrin) in a group of volunteers (n = 50) who were prospective candidates for bariatric surgery at the outpatient clinic of the USZ. Each stimulus was rated by volunteers using a self-reported 100-mm visual analogue scale (VAS) for five parameters: (1) aroma, (2) taste, (3) sweetness, (4) texture, and (5) liking of the consumed stimulus. The participants rated their responses on a scale ranging from “very unpleasant” to “very pleasant” for questions 1, 2, and 4. For question 3, the scale went from “unsweet” to “very sweet,” and for question 5, it ranged from “not at all” to “very much.” Supplementary Figure 1 displays the results of the test. The formulation number 3 of the four stimuli had the lowest inter-quartile ranges for aroma, taste, and sweetness, and the highest mean values of texture and liking for the four stimuli. The final formulation is shown in Table 3 of the main text.

Supplementary Figure 1: Evaluation with 100-mm Visual Analogue Scale (VAS) of aroma, taste, sweetness, texture and liking for the four study stimuli, each proposed with three different proportions of the ingredients (cow milk, cow cream, sucrose, and maltodextrin).

[Supplementary Table 1: Baseline characteristics of the study participants of the Roux-en-Y Gastric Bypass group in The Netherlands (Rijnstate) and in Switzerland (University Hospital Zurich), respectively. 10](#_Toc186800339)

[Supplementary Table 2: Baseline characteristics of the study group with Obesity and of the study group undrgoing Roux-en-Y Gastric Bypass surgery. 11](#_Toc186800340)

[Supplementary Table 3: Measures of body weight of the study group undergoing Roux-en-Y Gastric Bypass (RYGB) surgery over the study period. The months refer to the number of months after RYGB surgery and not after the baseline measurement. 12](#_Toc186800341)

[Supplementary Table 4: Changes of body weight of the study group undergoing Roux-en-Y Gastric Bypass (RYGB) over the study period. 13](#_Toc186800342)

[Supplementary Table 5: Changes of body weight of the study group with obesity over the study period. 14](#_Toc186800343)

[Supplementary Table 6: Changes of body weight of the study group with normal weight over the study period. 15](#_Toc186800344)

[Supplementary Table 7: Measures of total energy intake and absolute energy intake from macronutrients of the study group undergoing Roux-en-Y Gastric Bypass (RYGB) surgery over the study period. The months refer to the number of months after RYGB surgery and not after the baseline measurement. 16](#_Toc186800345)

[Supplementary Table 8: Measures of total energy intake and absolute energy intake from macronutrients of the study group with obesity over the study period. 17](#_Toc186800346)

[Supplementary Table 9: Measures of total energy intake and absolute energy intake from macronutrients of the study group with normal weight over the study period. 18](#_Toc186800347)

[Supplementary Table 10: Changes of total energy intake and absolute energy intake from macronutrients of the study group undergoing Roux-en-Y Gastric Bypass (RYGB) surgery over the study period. 19](#_Toc186800348)

[Supplementary Table 11: Changes of total energy intake and absolute energy intake from macronutrients of the study group with obesity over the study period. 21](#_Toc186800349)

[Supplementary Table 12: Changes of total energy intake and absolute energy intake from macronutrients of the study group with normal weight over the study period. 23](#_Toc186800350)

[Supplementary Table 13: Results of the Analysis of Variance for Absolute Intake of Energy, Carbohydrate, Sugar, Sucrose, Fat, and Protein among the three study groups, using the group with obesity as the reference group. 24](#_Toc186800351)

[Supplementary Table 14: Significant Pairwise Comparisons of Energy Intake Differences Between Baseline and Follow-up Time Points Within Cohorts. 25](#_Toc186800352)

[0Supplementary Table 15: Significant Pairwise Comparisons of Energy Intake Differences Between Baseline and Follow-up Time Points Between Cohorts. 26](#_Toc186800353)

[4Supplementary Table 16: Significant Pairwise Comparisons of Energy Intake from Carbohydrates Differences Between Baseline and Follow-up Time Points Within Cohorts. 27](#_Toc186800354)

[Supplementary Table 17: Significant Pairwise Comparisons of Energy Intake from Carbohydrates Differences Between Baseline and Follow-up Time Points Between Cohorts. 28](#_Toc186800355)

[Supplementary Table 18: Significant Pairwise Comparisons of Energy Intake from Sugars Differences Between Baseline and Follow-up Time Points Within Cohorts. 29](#_Toc186800356)

[.Supplementary Table 19: Significant Pairwise Comparisons of Energy Intake from Sugars Differences Between Baseline and Follow-up Time Points Between Cohorts. 30](#_Toc186800357)

[Supplementary Table 20: Significant Pairwise Comparisons of Energy Intake from Sucrose Differences Between Baseline and Follow-up Time Points Between Cohorts. 31](#_Toc186800358)

[Supplementary Table 21: Significant Pairwise Comparisons of Energy Intake from Fats Differences Between Baseline and Follow-up Time Points Between Cohorts. 32](#_Toc186800359)

[Supplementary Table 22: Significant Pairwise Comparisons of Energy Intake from Proteins Differences Between Baseline and Follow-up Time Points Within Cohorts. 33](#_Toc186800360)

[Supplementary Table 23: Significant Pairwise Comparisons of Energy Intake from Proteins Differences Between Baseline and Follow-up Time Points Between Cohorts. 34](#_Toc186800361)

[Supplementary Table 24: Results of the Analysis of Covariance for Relative Intake of Carbohydrate, Sugar, Sucrose, Fat, and Protein among the three study groups, using the group with obesity as the reference group, when adjusting for baseline values. 36](#_Toc186800362)

[Supplementary Table 25: Results of the Analysis of Variance for relative Intake of Carbohydrate, Sugar, Sucrose, Fat, and Protein among the three study groups, using the group with obesity as the reference group. 37](#_Toc186800363)

[Supplementary Table 26: Measures of relative macronutrient intake of the study group undergoing Roux-en-Y Gastric Bypass (RYGB) surgery over the study period. The months refer to the number of months after RYGB surgery and not after the baseline measurement. 39](#_Toc186800364)

[Supplementary Table 27: Changes of relative energy intake from macronutrients of the study group undergoing Roux-en-Y Gastric Bypass (RYGB) surgery over the study period. 40](#_Toc186800365)

[Supplementary Table 28: Measures of relative energy intake from macronutrients of the study group with obesity over the study period. 41](#_Toc186800366)

[Supplementary Table 29: Changes of relative energy intake from macronutrients of the study group with obesity over the study period. 42](#_Toc186800367)

[Supplementary Table 30: Measures of relative energy intake from macronutrients of the study group with normal weight over the study period. 43](#_Toc186800368)

[Supplementary Table 31: Changes of relative energy intake from macronutrients of the study group with normal weight over the study period. 44](#_Toc186800369)

[Supplementary Table 32: Results of Linear Correlation Analysis for Weight Loss and Energy Intake from Sugars in the study group undergoing Roux-en-Y Gastric Bypass (RYGB) surgery. 45](#_Toc186800370)

[Supplementary Table 33: Results of Linear Correlation Analysis for Weight Loss and Decrease in Energy Intake from Sugars Compared to Baseline in the study group undergoing Roux-en-Y Gastric Bypass (RYGB) surgery. 46](#_Toc186800371)

[Supplementary Table 34: Results of Partial Correlation Analysis for Weight Loss and Energy Intake from Sugars Adjusted for Basal Metabolic Rate (BMR) in the study group undergoing Roux-en-Y Gastric Bypass (RYGB) surgery. 47](#_Toc186800372)

[Supplementary Table 35: Results of Partial Correlation Analysis for Weight Loss and Decrease in Energy Intake from Sugars Compared to Baseline Adjusted for Basal Metabolic Rate (BMR) in the study group undergoing Roux-en-Y Gastric Bypass (RYGB) surgery. 48](#_Toc186800373)

[Supplementary Table 36: Results of Linear Correlation Analysis for Weight Loss and Energy Intake from Carbohydrates in the study group undergoing Roux-en-Y Gastric Bypass (RYGB) surgery. 49](#_Toc186800374)

[Supplementary Table 37: Results of Linear Correlation Analysis for Weight Loss and Energy Intake from Sucrose in the study group undergoing Roux-en-Y Gastric Bypass (RYGB) surgery. 50](#_Toc186800375)

[Supplementary Table 38: Results of Linear Correlation Analysis for Weight Loss and Decrease in Energy Intake from Carbohydrates compared to Baseline in the study group undergoing Roux-en-Y Gastric Bypass (RYGB) surgery. 51](#_Toc186800376)

[Supplementary Table 39: Results of Linear Correlation Analysis for Weight Loss and Decrease in Energy Intake from Sucrose Compared to Baseline in the study group undergoing Roux-en-Y Gastric Bypass (RYGB) surgery. 52](#_Toc186800377)

[Supplementary Table 40: Results of Partial Correlation Analysis for Weight Loss and Energy Intake from Carbohydrates Adjusted for Basal Metabolic Rate (BMR) in the study group undergoing Roux-en-Y Gastric Bypass (RYGB) surgery. 53](#_Toc186800378)

[Supplementary Table 41: Results of Partial Correlation Analysis for Weight Loss and Energy Intake from Sucrose Adjusted for Basal Metabolic Rate (BMR) in the study group undergoing Roux-en-Y Gastric Bypass (RYGB) surgery. 54](#_Toc186800379)

[Supplementary Table 42: Results of Partial Correlation Analysis for Weight Loss and Decrease in Energy Intake from Carbohydrates Compared to Baseline Adjusted for Basal Metabolic Rate (BMR) in the study group undergoing Roux-en-Y Gastric Bypass (RYGB) surgery. 55](#_Toc186800380)

[Supplementary Table 43: Results of Partial Correlation Analysis for Weight Loss and Decrease in Energy Intake from Sucrose Compared to Baseline Adjusted for Basal Metabolic Rate (BMR) in the study group undergoing Roux-en-Y Gastric Bypass (RYGB) surgery. 56](#_Toc186800381)

[Supplementary Table 44: Results of Linear Correlation Analysis for Weight Loss and Energy Intake from Fats in the study group undergoing Roux-en-Y Gastric Bypass (RYGB) surgery. 57](#_Toc186800382)

[Supplementary Table 45: Results of Linear Correlation Analysis for Weight Loss and Decrease in Energy Intake from Fats compared to Baseline in the study group undergoing Roux-en-Y Gastric Bypass (RYGB) surgery. 58](#_Toc186800383)

[Supplementary Table 46: Results of Partial Correlation Analysis for Weight Loss and Energy Intake from Fats Adjusted for Basal Metabolic Rate (BMR) in the study group undergoing Roux-en-Y Gastric Bypass (RYGB) surgery. 59](#_Toc186800384)

[Supplementary Table 47: Results of Partial Correlation Analysis for Weight Loss and Decrease in Energy Intake from Fats Compared to Baseline Adjusted for Basal Metabolic Rate (BMR) in the study group undergoing Roux-en-Y Gastric Bypass (RYGB) surgery. 60](#_Toc186800385)

[Supplementary Table 48: Results of Linear Correlation Analysis for Weight Loss and Energy Intake from Proteins in the study group undergoing Roux-en-Y Gastric Bypass (RYGB) surgery. 61](#_Toc186800386)

[Supplementary Table 49: Results of Linear Correlation Analysis for Weight Loss and Decrease in Energy Intake from Proteins Compared to Baseline in the study group undergoing Roux-en-Y Gastric Bypass (RYGB) surgery. 62](#_Toc186800387)

[Supplementary Table 50: Results of Partial Correlation Analysis for Weight Loss and Energy Intake from Proteins Adjusted for Basal Metabolic Rate (BMR) in the study group undergoing Roux-en-Y Gastric Bypass (RYGB) surgery. 63](#_Toc186800388)

[Supplementary Table 51: Results of Partial Correlation Analysis for Weight Loss and Decrease in Energy Intake from Proteins Compared to Baseline Adjusted for Basal Metabolic Rate (BMR) in the study group undergoing Roux-en-Y Gastric Bypass (RYGB) surgery. 64](#_Toc186800389)

[Supplementary Table 52: Summary Statistics of the Energy Intake from Each of the Four Stimuli for the Study Groups Throughout the Study Period. 65](#_Toc186800390)

[Supplementary Table 53: Significant Pairwise Comparisons of Energy Intake from Each of the Four Stimuli Between Baseline and Follow-up Time Points Between Cohorts. 66](#_Toc186800391)

[Supplementary Table 54: Contingengy Table of the Frequency of Each Stimulus being the Most Consumed at Any Time Points for The Study Group with RYGB. 67](#_Toc186800392)

[Supplementary Table 55: Contingengy Table of the Frequency of Each Stimulus being the Most Consumed at Any Time Points for The Study Group with Obesity. 68](#_Toc186800393)

[Supplementary Table 56: Contingengy Table of the Frequency of Each Stimulus being the Most Consumed at Any Time Points for The Study Group with Normal Weight. 69](#_Toc186800394)

[Supplementary Table 57: Contingengy Table of the Frequency of Each Stimulus being the Most Liked at Any Time Points for The Study Group with RYGB. 70](#_Toc186800395)

[Supplementary Table 58: Contingency Table of the Frequency of Each Stimulus being the Most Liked at Any Time Points for The Study Group with Obesity. 71](#_Toc186800396)

[Supplementary Table 59: Contingency Table of the Frequency of Each Stimulus being the Most Liked at Any Time Points for The Study Group with Normal Weight. 72](#_Toc186800397)

[Supplementary Table 60: Summary Statistics of the Number of Stimuli Drank From for the Study Groups Throughout the Study Period. 73](#_Toc186800398)

[Supplementary Table 61: Summary Statistics of the Number of Switches Between Stimuli Drank From for the Study Groups Throughout the Study Period. 74](#_Toc186800399)

[Supplementary Table 62: Significant Pairwise Comparisons of Number of Stimuli Drank From Between Baseline and Follow-up Time Points Between Cohorts. 75](#_Toc186800400)

[Supplementary Table 63: Significant Pairwise Comparisons of Number of Switches Between Stimuli Drank From Between Baseline and Follow-up Time Points Between Cohorts. 76](#_Toc186800401)

[Supplementary Table 64: Mean Percentage of the Energy Intake from Each of the Four Stimuli for the Study Groups Throughout the Study Period. 77](#_Toc186800402)

[Supplementary Table 65: Summary Statistics of the Energy Intake from Each of the Four Stimuli for the Study Groups Throughout the Study Period. 78](#_Toc186800403)

[Supplementary Table 66: Results of Partial Correlation Analysis for Energy Intake from the Most-Liked Stimulus and its Reported Liking Adjusted for Basal Metabolic Rate (BMR) in the Three Study Groups. 79](#_Toc186800404)

[Supplementary Table 67: Results of Kendall’s Tau for Energy Intake from the Four Stimuli and Their Reported Liking in the Study Group Undergoing Roux-en-Y Gastric Bypass (RYGB) Surgery. 80](#_Toc186800405)

[Supplementary Table 68: Results of Kendall’s Tau for Energy Intake from the Four Stimuli and Their Reported Liking in the Study Group with Obesity. 81](#_Toc186800406)

[Supplementary Table 69: Results of Kendall’s Tau for Energy Intake from the Four Stimuli and Their Reported Liking in the Study Group with Normal Weight. 82](#_Toc186800407)

[Supplementary Table 70: Average of Differences Between Guessed Consumption and Volume Consumed During the Drinkometer Test for the Three Study Groups. 83](#_Toc186800408)

[Supplementary Table 71: Differences Between Guessed Consumption and Volume Consumed During the Drinkometer Test for the Three Study Groups Throughout the Study Period. 84](#_Toc186800409)

[Supplementary Table 72: Results of Linear Correlation Analysis for Guessed Consumption and Volume Consumed During the Drinkometer Test in the Three Study Groups. 85](#_Toc186800410)

[Supplementary Table 73: Bland-Altman Analysis for Agreement Between Guessed Consumption and Volume Consumed During the Drinkometer Test in the Three Study Groups. 86](#_Toc186800411)

[Supplementary Table 74: Summary Statistics of appetite sensations reported with a 100-mm visual analogue scale by the study group undergoing Roux-en-Y Gastric Bypass (RYGB) surgery over the study period. The months refer to the number of months after RYGB surgery and not after the baseline measurement. 87](#_Toc186800412)

[Supplementary Table 75: Summary Statistics of appetite sensations reported with a 100-mm visual analogue scale by the study group with obesity over the study period. The months refer to the number of months after the baseline measurement. 88](#_Toc186800413)

[Supplementary Table 76: Summary Statistics of appetite sensations reported with a 100-mm visual analogue scale by the study group with normal weight over the study period. The months refer to the number of months after the baseline measurement. 89](#_Toc186800414)

[***Supplementary Table 77: Significant Pairwise Comparisons of Hunger Between Baseline and Follow-up Time Points Between Cohorts.*** 90](#_Toc186800415)

[***Supplementary Table 78: Significant Pairwise Comparisons of Desire To Eat Between Baseline and Follow-up Time Points Between Cohorts.*** 91](#_Toc186800416)

[Supplementary Table 79: Summary Statistics of Satiety Quotient (Composite of Hunger and Desire To Eat) of the Three Study Groups Over the Study Period. The Months Refer to the Number of Months After RYGB Surgery for the Group Undergoing Roux-en-Y Gastric Bypass (RYGB) Surgery and After the Baseline Measurement for the Groups With Obesity and Normal Weight. 92](#_Toc186800417)

[Supplementary Table 80: Summary Statistics of postprandial decrease in appetite sensations of the three study groups over the study period. The months refer to the number of months after RYGB surgery for the group undergoing Roux-en-Y Gastric Bypass (RYGB) surgery and after the baseline measurement for the groups with obesity and normal weight. 93](#_Toc186800418)

[***Supplementary Table 81: Significant Pairwise Comparisons of Postprandial Decrease in Appetite Sensations Between Baseline and Follow-up Time Points Between Cohorts.*** 94](#_Toc186800419)

[Supplementary Table 82: Results of Partial Correlation Analysis for Postprandial Decrease in Hunger and Energy Intake During the Drinkometer Test in the Three Study Groups. 95](#_Toc186800420)

[Supplementary Table 83: Results of Partial Correlation Analysis for Postprandial Decrease in Desire To Eat and Energy Intake During the Drinkometer Test in the Three Study Groups. 96](#_Toc186800421)

# Study Group

Supplementary Table : Baseline characteristics of the study participants of the Roux-en-Y Gastric Bypass group in The Netherlands (Rijnstate) and in Switzerland (University Hospital Zurich), respectively.

|  | **Cohort** | |  |
| --- | --- | --- | --- |
|  | **NL***  N = 13 | **CH***  N = 10 | **p-value†** |
| **Age (years)** | 43.6 (9.3) | 40.6 (11.6) | 0.45 |
| **Body Height (m)** | 1.7 (0.1) | 1.7 (0.0) | 0.20 |
| **Body Weight (kg)** | 116.7 (13.8) | 108.8 (10.1) | 0.17 |
| **BMI (kg/m2)** | 40.3 (2.7) | 39.7 (3.3) | 0.73 |
| **Waist circumference (cm)** | 118.2 (10.7) | 111.4 (10.6) | 0.18 |
| **Special Diet** |  |  |  |
| *None* | 13 / 13 (100%) | 10 / 10 (100%) |  |
| **Physical Actvity (hrs/week)** | 9 / 13 (69%) | 3 / 10 (30%) | 0.18 |
| *None* | 2 / 13 (15%) | 4 / 10 (40%) |  |
| *1-2 hrs/week* | 2 / 13 (15%) | 3 / 10 (30%) |  |
| *2-6 hrs/week* | 7.0 (0.4) | 7.2 (2.1) |  |
| **Nights's Sleep (hrs)** | 3 / 13 (23%) | 2 / 10 (20%) | 0.69 |
| **Menstruation cycle** | 3 / 13 (23%) | 3 / 10 (30%) | >0.99 |
| *Menopause* | 7 / 13 (54%) | 5 / 10 (50%) |  |
| *Not reported* | 2 / 13 (15%) | 4 / 10 (40%) |  |
| *Regular cycle* | 43.6 (9.3) | 40.6 (11.6) |  |
| **Smoking*‡*** | 1.7 (0.1) | 1.7 (0.0) | 0.34 |
| Abbreviations: **NL**, Vitalys Obesity Clinic, Part of Rijnstate Hospital, The Netherlands; **CH**, University Hospital Zurich, Switzerland.  *** Mean (SD) or Frequency (%). SD, standard deviation; %, percentage. *†* Wilcoxon rank sum test; Wilcoxon rank sum exact test; Fisher's exact test  *‡* Independent of the number of cigarettes smoked and smoking occasions. | | | |

Supplementary Table : Baseline characteristics of the study group with Obesity and of the study group undrgoing Roux-en-Y Gastric Bypass surgery.

|  | **Cohort** | |  |
| --- | --- | --- | --- |
|  | **Obesity***  N = 24 | **RYGB***  N = 23 | **p-value†** |
| **Age (years)** | 45.2 (13.3) | 42.3 (10.2) | 0.40 |
| **Body Height (m)** | 1.6 (0.1) | 1.7 (0.1) | 0.046 |
| **Body Weight (kg)** | 98.1 (15.4) | 113.2 (12.7) | <0.001 |
| **BMI (kg/m2)** | 36.8 (4.5) | 40.0 (2.9) | 0.005 |
| **Waist circumference (cm)** | 109.5 (12.5) | 115.2 (11.0) | 0.20 |
| **Special Diet** |  |  | 0.49 |
| *None* | 22 / 24 (92%) | 23 / 23 (100%) |  |
| *Low-Carb Diet* | 2 / 24 (8.3%) | 0 / 23 (0%) |  |
| **Physical Actvity (hrs/week)** |  |  | 0.35 |
| *None* | 11 / 24 (46%) | 12 / 23 (52%) |  |
| *1-2 hrs/week* | 3 / 24 (12%) | 6 / 23 (26%) |  |
| *2-6 hrs/week* | 8 / 24 (33%) | 5 / 23 (22%) |  |
| *> 6 hrs/week* | 2 / 24 (8.3%) | 0 / 23 (0%) |  |
| **Nights's Sleep (hrs)** | 6.9 (1.4) | 7.1 (1.4) | 0.92 |
| **Menstruation cycle** |  |  | 0.13 |
| *Menopause* | 8 / 24 (33%) | 5 / 23 (22%) |  |
| *Not reported* | 1 / 24 (4.2%) | 6 / 23 (26%) |  |
| *Regular cycle* | 15 / 24 (62%) | 12 / 23 (52%) |  |
| **Smoking*‡*** | 2 / 24 (8.3%) | 6 / 23 (26%) | 0.14 |
| Abbreviations: **RYGB**, Roux-en-Y Gastric Bypass.  *** Mean (SD) or Frequency (%). SD, standard deviation; %, percentage. *†* Wilcoxon rank sum test; Wilcoxon rank sum exact test; Fisher's exact test  *‡* Independent of the number of cigarettes smoked and smoking occasions. | | | |

# Effect of RYGB on body weight

Supplementary Table : Measures of body weight of the study group undergoing Roux-en-Y Gastric Bypass (RYGB) surgery over the study period. The months refer to the number of months after RYGB surgery and not after the baseline measurement.

|  | **RYGB group** | | | | |
| --- | --- | --- | --- | --- | --- |
|  | **Baseline***  N = 23 | **1 month***  N = 19 | **3 months***  N = 21 | **6 months***  N = 19 | **12 months***  N = 20 |
| **Body Weight (kg)** | 113.2  (12.7) | 103.0  (9.5) | 91.9  (10.2) | 82.0  (10.5) | 74.3  (9.4) |
| **BMI (kg/m2)** | 40.0  (2.9) | 36.8  (2.8) | 33.0  (3.0) | 29.1  (3.0) | 26.5  (3.0) |
| **Waist circumference (cm)** | 115.2  (11.0) | 111.2  (10.9) | 100.6  (16.0) | 93.9  (12.4) | 91.2  (9.7) |
| **%EBMIL** | 0.0  (0.0) | 22.6  (6.4) | 48.3  (11.7) | 74.9  (20.3) | 92.5  (19.3) |
| **%TWL** | 0.0  (0.0) | 8.4  (2.3) | 17.5  (2.8) | 27.3  (5.7) | 33.5  (5.6) |
| Abbreviations: **BMI**, Body Mass Index; **RYGB**, Roux-en-Y Gastric Bypass; **%EBMIL**, Percentage Excess Body Mass Index Loss; **%TWL**, Percentage Total Weight Loss.  *** Mean (SD). SD, standard deviation. | | | | | |

Supplementary Table : Changes of body weight of the study group undergoing Roux-en-Y Gastric Bypass (RYGB) over the study period.

|  | **Study Visit** | | **Difference*#*** | **p-value†** |
| --- | --- | --- | --- | --- |
|  | **Baseline***  N = 23 | **End of follow-up***  N = 20 |
| **Body Weight (kg)** | 113.2 (12.7) | 74.3 (9.4) | –38.9  (–46, –32) | < 0.001 |
| **BMI (kg/m2)** | 40.0 (2.9) | 26.5 (3.0) | –13.6  (–15, –12) | < 0.001 |
| **Waist circumference (cm)** | 115.2 (11.0) | 91.2 (9.7) | –24.1  (–30, –18) | < 0.001 |
| **%EBMIL** | 0.0 (0.0) | 92.5 (19.3) | 92.5  (84, 101) | < 0.001 |
| **%TWL** | 0.0 (0.0) | 33.5 (5.6) | 33.5  (31, 36) | < 0.001 |
| Abbreviations: **RYGB**, Roux-en-Y Gastric Bypass.  *** Mean (SD) or Frequency (%). SD, standard deviation; %, percentage. *†* Wilcoxon rank sum test; Wilcoxon rank sum exact test; Fisher's exact test  *#* 95 % Confidence Interval. | | | | |

Supplementary Table : Changes of body weight of the study group with obesity over the study period.

|  | **Study Visit** | | **Difference*#*** | **p-value†** |
| --- | --- | --- | --- | --- |
|  | **Baseline***  N = 24 | **End of follow-up***  N = 22 |
| **Body Weight (kg)** | 98.1 (15.4) | 98.4 (15.7) | 0.3  (–8.7, 9.3) | > 0.9 |
| **BMI (kg/m2)** | 36.8 (4.5) | 36.7 (4.6) | –0.1  (–2.7, 2.6) | > 0.9 |
| **Waist circumference (cm)** | 109.5 (12.2) | 111.1 (12.7) | 1.6  (–5.6, 8.8) | 0.7 |
| **%EBMIL** | 0.0 (0.0) | –2.1 (9.2) | –2.1  (–6.0, 1.7) | 0.3 |
| **%TWL** | 0.0 (0.0) | –0.6 (2.9) | –0.6  (–1.9, 0.6) | 0.3 |
| Abbreviations: **RYGB**, Roux-en-Y Gastric Bypass.  *** Mean (SD) or Frequency (%). SD, standard deviation; %, percentage. *†* Wilcoxon rank sum test; Wilcoxon rank sum exact test; Fisher's exact test  *#* 95 % Confidence Interval. | | | | |

Supplementary Table : Changes of body weight of the study group with normal weight over the study period.

|  | **Study Visit** | | **Difference*#*** | **p-value†** |
| --- | --- | --- | --- | --- |
|  | **Baseline***  N = 11 | **End of follow-up***  N = 10 |
| **Body Weight (kg)** | 63.8 (7.8) | 62.5 (6.1) | –1.3  (–7.5, 5.0) | 0.7 |
| **BMI (kg/m2)** | 22.8 (2.5) | 22.4 (1.8) | –0.4  (–2.4, 1.5) | 0.6 |
| **Waist circumference (cm)** | 73.7 (6.7) | 73.7 (4.7) | 0.1  (–5.1, 5.3) | > 0.9 |
| **%EBMIL** | NA | NA | NA | NA |
| **%TWL** | 0.0 (0.0) | 0.2 (2.3) | 0.2  (–2.1, 2.5) | 0.8 |
| Abbreviations: **NA**, Not Applicable; **RYGB**, Roux-en-Y Gastric Bypass.  *** Mean (SD) or Frequency (%). SD, standard deviation; %, percentage. *†* Wilcoxon rank sum test; Wilcoxon rank sum exact test; Fisher's exact test  *#* 95 % Confidence Interval. | | | | |

# Effect of RYGB on Total Energy Intake and Energy Intake from Macronutrients

Supplementary Table : Measures of total energy intake and absolute energy intake from macronutrients of the study group undergoing Roux-en-Y Gastric Bypass (RYGB) surgery over the study period. The months refer to the number of months after RYGB surgery and not after the baseline measurement.

|  | **RYGB** | | | | |
| --- | --- | --- | --- | --- | --- |
|  | **Baseline***  N = 23 | **1 month***  N = 19 | **3 months***  N = 21 | **6 months***  N = 19 | **12 months***  N = 20 |
| **Energy (kcal)** | 406.0 (297.4) | 160.6 (72.1) | 189.7 (93.9) | 225.3 (93.8) | 240.6 (138.0) |
| **Carbohydrates (kcal)** | 242.0 (205.1) | 72.6 (35.0) | 88.8 (56.0) | 92.2 (41.6) | 118.6 (98.3) |
| **Sugar (kcal)** | 91.6 (80.4) | 33.8 (15.1) | 41.5 (27.4) | 44.7 (14.9) | 53.3 (34.1) |
| **Sucrose (kcal)** | 32.7 (40.3) | 11.0 (7.9) | 14.5 (16.0) | 12.8 (6.5) | 19.0 (16.2) |
| **Fat (kcal)** | 125.6 (121.1) | 73.0 (57.7) | 83.2 (73.5) | 112.0 (74.9) | 99.5 (72.4) |
| **Protein (kcal)** | 37.1 (27.2) | 14.5 (6.4) | 17.2 (8.4) | 20.3 (8.3) | 21.8 (12.6) |
| Abbreviations: **RYGB**, Roux-en-Y Gastric Bypass.  *** Mean (SD). SD, standard deviation. | | | | | |

Supplementary Table : Measures of total energy intake and absolute energy intake from macronutrients of the study group with obesity over the study period.

|  | **Obesity** | | | | |
| --- | --- | --- | --- | --- | --- |
|  | **Baseline***  N = 24 | **1 month***  N = 0 | **3 months***  N = 22 | **6 months***  N = 22 | **12 months***  N = 0 |
| **Energy (kcal)** | 558.1 (312.2) | – | 633.5 (314.3) | 650.6 (236.4) | – |
| **Carbohydrates (kcal)** | 252.5 (173.4) | – | 293.9 (191.0) | 316.6 (206.1) | – |
| **Sugar (kcal)** | 131.2 (85.1) | – | 147.1 (77.9) | 138.3 (53.9) | – |
| **Sucrose (kcal)** | 52.6 (45.6) | – | 57.5 (42.0) | 45.5 (30.4) | – |
| **Fat (kcal)** | 254.0 (196.9) | – | 280.7 (205.2) | 272.9 (186.9) | – |
| **Protein (kcal)** | 50.4 (28.1) | – | 57.3 (28.4) | 58.9 (21.5) | – |
| *** Mean (SD). SD, standard deviation. | | | | | |

Supplementary Table : Measures of total energy intake and absolute energy intake from macronutrients of the study group with normal weight over the study period.

|  | **Normal-Weight** | | | | |
| --- | --- | --- | --- | --- | --- |
|  | **Baseline***  N = 11 | **1 month***  N = 0 | **3 months***  N = 11 | **6 months***  N = 10 | **12 months***  N = 10 |
| **Energy (kcal)** | 556.7 (276.4) | – | 582.6 (224.2) | 719.6 (235.2) | 688.6 (213.5) |
| **Carbohydrates (kcal)** | 221.5 (113.2) | – | 290.5 (185.9) | 289.4 (115.1) | 284.7 (142.6) |
| **Sugar (kcal)** | 119.6 (56.6) | – | 128.9 (54.3) | 160.7 (54.4) | 149.0 (37.9) |
| **Sucrose (kcal)** | 41.6 (24.2) | – | 45.6 (29.6) | 59.8 (33.7) | 52.1 (22.8) |
| **Fat (kcal)** | 283.5 (183.7) | – | 237.4 (172.1) | 363.4 (190.4) | 339.7 (169.8) |
| **Protein (kcal)** | 50.0 (24.6) | – | 52.8 (20.4) | 64.7 (20.8) | 62.0 (19.2) |
| *** Mean (SD). SD, standard deviation. | | | | | |

Supplementary Table : Changes of total energy intake and absolute energy intake from macronutrients of the study group undergoing Roux-en-Y Gastric Bypass (RYGB) surgery over the study period.

|  | **Study Visit** | | **Difference*#*** | **p-value†** |
| --- | --- | --- | --- | --- |
|  | **Baseline***  N = 23 | **End of follow-up***  N = 20 |
| **Energy (kcal)** | 406.0 (297.4) | 240.6 (138.0) | –165.4  (–305.0, –26.0) | 0.022 |
| **Carbohydrates (kcal)** | 242.0 (205.1) | 118.6 (98.3) | –123.4  (–220.0, –27.0) | 0.014 |
| **Sugar (kcal)** | 91.6 (80.4) | 53.3 (34.1) | –38.3  (–76.0, –1.1) | 0.044 |
| **Sucrose (kcal)** | 32.7 (40.3) | 19.0 (16.2) | –13.7  (–32.0, 4.9) | 0.14 |
| **Fat (kcal)** | 125.6 (121.1) | 99.5 (72.4) | –26.1  (–86.0, 34.0) | 0.4 |
| **Protein (kcal)** | 37.1 (27.2) | 21.8 (12.6) | 15.3  (–28.0, –2.6) | 0.020 |
| *** Mean (SD) or Frequency (%). SD, standard deviation; %, percentage. *†* Wilcoxon rank sum test; Wilcoxon rank sum exact test; Fisher's exact test  *#* 95 % Confidence Interval. | | | | |

Supplementary Table : Changes of total energy intake and absolute energy intake from macronutrients of the study group with obesity over the study period.

|  | **Study Visit** | | **Difference*#*** | **p-value†** |
| --- | --- | --- | --- | --- |
|  | **Baseline***  N = 24 | **End of follow-up***  N = 22 |
| **Energy (kcal)** | 558.1 (312.2) | 650.6 (236.4) | 92.5  (–69.0, 254.0) | 0.3 |
| **Carbohydrates (kcal)** | 252.5 (173.4) | 316.6 (206.1) | 64.1  (–47.0, 175.0) | 0.2 |
| **Sugar (kcal)** | 131.2 (85.1) | 138.3 (53.9) | 7.1  (–34.0,49.0) | 0.7 |
| **Sucrose (kcal)** | 52.6 (45.6) | 45.5 (30.4) | –7.2  (–30.0,15.0) | 0.5 |
| **Fat (kcal)** | 254.0 (196.9) | 272.9 (186.9) | 18.9  (–93.0, 130.0) | 0.7 |
| **Protein (kcal)** | 50.4 (28.1) | 58.9 (21.5) | 8.5  (–6.1, 23.0) | 0.2 |
| *** Mean (SD) or Frequency (%). SD, standard deviation; %, percentage. *†* Wilcoxon rank sum test; Wilcoxon rank sum exact test; Fisher's exact test  *#* 95 % Confidence Interval. | | | | |

Supplementary Table : Changes of total energy intake and absolute energy intake from macronutrients of the study group with normal weight over the study period.

|  | **Study Visit** | | **Difference*#*** | **p-value†** |
| --- | --- | --- | --- | --- |
|  | **Baseline***  N = 11 | **End of follow-up***  N = 10 |
| **Energy (kcal)** | 556.7 (276.4) | 688.6 (213.5) | 131.9  (–89.0, 353.0) | 0.2 |
| **Carbohydrates (kcal)** | 221.5 (113.2) | 284.7 (142.6) | 63.3  (–52.0, 178.0) | 0.3 |
| **Sugar (kcal)** | 119.6 (56.6) | 149.0 (37.9) | 29.4  (–14.0, 73.0) | 0.2 |
| **Sucrose (kcal)** | 41.6 (24.2) | 52.1 (22.8) | 10.5  (–10.0, 31.0) | 0.3 |
| **Fat (kcal)** | 283.5 (183.7) | 339.7 (169.8) | 56.2  (–101.0, 214.0) | 0.5 |
| **Protein (kcal)** | 50.0 (24.6) | 62.0 (19.2) | 11.9  (–7.8, 32.0) | 0.2 |
| *** Mean (SD) or Frequency (%). SD, standard deviation; %, percentage. *†* Wilcoxon rank sum test; Wilcoxon rank sum exact test; Fisher's exact test  *#* 95 % Confidence Interval. | | | | |

Supplementary Table : Results of the Analysis of Variance for Absolute Intake of Energy, Carbohydrate, Sugar, Sucrose, Fat, and Protein among the three study groups, using the group with obesity as the reference group.

The table presents the results of the Analysis of Variance (ANOVA) for the cumulative intake of energy, carbohydrate, sugar, sucrose, fat, and protein (in kcal) among the three study groups (Obesity, Normal-Weight, and RYGB). The group with obesity is used as the reference group. For each variable, the table reports the estimated differences, standard errors (SE), t-values, p-values, and 95% confidence intervals (CI) for the Normal-Weight and RYGB groups compared to the reference group. Additionally, residual standard error (SE), multiple R-squared (R²), adjusted R², F-statistic (F), and overall p-value for each model are included. The F-statistic is reported with the degrees of freedom between the groups (df1, numerator) and the degrees of freedom within the groups (df2, denominator) as F(df1, df2). The standard errors and residual standard errors were estimated using the ordinary least squares (OLS) method, which calculates the variability of the coefficient estimates and residuals by minimizing the sum of the squared differences between the observed and predicted values. The R-squared (R²) value represents the proportion of the variance in the dependent variable that is explained by the independent variables in the model.

| **Variable** |  | **Estimate** | **SE** | **t value** | **Pr(>|t|)** | **Lower**  **95% CI** | **Upper**  **95% CI** | **Residual**  **SE** | **Multiple**  **R2** | **Adjusted**  **R2** | **F(2, 55)** | **p-value** |
| --- | --- | --- | --- | --- | --- | --- | --- | --- | --- | --- | --- | --- |
| **Energy**  **(kcal)** | (Intercept) | 558.12 | 61.25 | 9.113 | < 0.001 |  |  | 300.1 | 0.06 | 0.03 | 1.77 | 0.179 |
| Normal-Weight | –1.44 | 109.25 | –0.013 | 0.9895 | –220.39 | 217.51 |
| RYGB | –152.15 | 87.55 | –1.738 | 0.0878 | –327.61 | 23.31 |
| **Carbohydrate**  **(kcal)** | (Intercept) | 252.49 | 36.36 | 6.944 | < 0.001 |  |  | 178.1 | 0.01 | –0.03 | 0.11 | 0.891 |
| Normal-Weight | –31.03 | 64.86 | –0.478 | 0.634 | –161.02 | 98.95 |
| RYGB | –10.51 | 51.98 | –0.202 | 0.840 | –114.68 | 93.66 |
| **Sugar**  **(kcal)** | (Intercept) | 131.22 | 16.07 | 8.166 | < 0.001 |  |  | 78.73 | 0.05 | 0.02 | 1.53 | 0.226 |
| Normal-Weight | –11.63 | 28.66 | –0.406 | 0.686 | –69.07 | 45.82 |
| RYGB | –39.58 | 22.97 | –1.723 | 0.090 | –85.62 | 6.46 |
| **Sucrose**  **(kcal)** | (Intercept) | 52.64 | 8.23 | 6.399 | < 0.001 |  |  | 40.29 | 0.05 | 0.02 | 1.45 | 0.244 |
| Normal-Weight | –11.06 | 14.67 | –0.754 | 0.454 | –40.46 | 18.34 |
| RYGB | –19.97 | 11.76 | –1.698 | 0.095 | –43.53 | 3.60 |
| **Fat**  **(kcal)** | (Intercept) | 254.03 | 34.28 | 7.410 | < 0.001 |  |  | 167.9 | 0.15 | 0.12 | 4.78 | **0.012** |
| Normal-Weight | 29.50 | 61.15 | 0.482 | 0.631 | –93.05 | 152.06 |
| RYGB | –128.39 | 49.01 | –2.620 | 0.011 | –226.6 | –30.18 |
| **Protein**  **(kcal)** | (Intercept) | 50.42 | 5.54 | 9.095 | < 0.001 |  |  | 27.16 | 0.06 | 0.02 | 1.64 | 0.204 |
| Normal-Weight | –0.38 | 9.89 | –0.038 | 0.970 | –20.19 | 19.44 |
| RYGB | –13.30 | 7.92 | –1.678 | 0.099 | –29.18 | 2.58 |
| Abbreviations: **CI**, confidence interval; **F**, F-statistic with df1 and df2; **R2**, R-squared; **RYGB**, Roux-en-Y Gastric Bypass; **SE**, standard errors. | | | | | | | | | | | | | |

Supplementary Table : Significant Pairwise Comparisons of Energy Intake Differences Between Baseline and Follow-up Time Points Within Cohorts.

The table presents the statistically significant estimated differences in energy intake (kcal) between baseline and the follow-up time points (1 month, 3 months, 6 months, and 12 months) within the three study groups (Obesity, Normal-Weight, and RYGB). The estimates are derived from a linear mixed model (LMM) with pairwise comparisons performed using estimated marginal means (EMM). The LMM was built with an interaction term between cohort and time point. Significant differences are reported with their corresponding standard errors (SE), degrees of freedom (DF), confidence intervals (lower 95% CI, upper 95% CI), t-ratios, and p-values. The standard errors were estimated using the ordinary least squares (OLS) method, which calculates the variability of the coefficient estimates and residuals by minimizing the sum of the squared differences between the observed and predicted values.

|  | Estimate | SE | DF | Lower  95% CI | Upper  95% CI | t-ratio | p-value |
| --- | --- | --- | --- | --- | --- | --- | --- |
| RYGB 1 month  vs  RYGB Baseline | –245.33 | 46.68 | 220 | –405.47 | –85.18 | –5.255 | **< 0.001** |
| RYGB 3 months  vs  RYGB Baseline | –216.25 | 46.68 | 220 | –376.39 | –56.10 | –4.632 | **< 0.001** |
| RYGB 6 months  vs  RYGB Baseline | –180.64 | 46.68 | 220 | –340.78 | –20.50 | –3.869 | **0.012** |
| RYGB 12 months  vs  RYGB Baseline | –165.38 | 46.68 | 220 | –325.52 | –5.23 | –3.543 | **0.035** |
| Abbreviations: **CI**, confidence interval; **DF**, degrees of freedom; **RYGB**, Roux-en-Y Gastric Bypass; **SE**, standard error. | | | | | | | |

Supplementary Table : Significant Pairwise Comparisons of Energy Intake Differences Between Baseline and Follow-up Time Points Between Cohorts.

The table presents the statistically significant estimated differences in energy intake (kcal) between the three study groups (Obesity, Normal-Weight, and RYGB) at each time point (baseline, 1 month, 3 months, 6 months, and 12 months). The estimates are derived from a linear mixed model (LMM) with pairwise comparisons performed using estimated marginal means (EMM). The LMM was built with an interaction term between cohort and time point. Significant differences are reported with their corresponding standard errors (SE), degrees of freedom (DF), confidence intervals (lower 95% CI, upper 95% CI), t-ratios, and p-values. The standard errors were estimated using the ordinary least squares (OLS) method, which calculates the variability of the coefficient estimates and residuals by minimizing the sum of the squared differences between the observed and predicted values.

|  | Estimate | SE | DF | Lower  95% CI | Upper  95% CI | t-ratio | p-value |
| --- | --- | --- | --- | --- | --- | --- | --- |
| RYGB 1 month  vs  Normal-Weight 1 month | –396.04 | 86.28 | 125 | –694.59 | –97.48 | –4.590 | 0.001 |
| RYGB 1 month  vs  Obesity 1 month | –397.48 | 68.67 | 125 | –635.12 | –159.84 | –5.788 | **< 0.001** |
| RYGB 3 months  vs  Normal-Weight 3 month | –392.87 | 86.28 | 125 | –691.43 | –94.32 | –4.554 | 0.001 |
| RYGB 3 months  vs  Obesity 3 month | –443.74 | 68.67 | 125 | –681.39 | –206.10 | –6.462 | **< 0.001** |
| RYGB 6 months  vs  Normal-Weight 6 month | –494.30 | 86.28 | 125 | –792.86 | –195.75 | –5.729 | **< 0.001** |
| RYGB 6 months  vs  Obesity 6 month | –425.28 | 68.67 | 125 | –662.92 | –187.63 | –6.193 | **< 0.001** |
| RYGB 12 months  vs  Normal-Weight 12 month | –448.03 | 86.28 | 125 | –746.59 | –149.48 | –5.193 | **< 0.001** |
| RYGB 12 months  vs  Obesity 12 month | –410.01 | 68.67 | 125 | –647.66 | –172.37 | –5.970 | **< 0.001** |
| Abbreviations: **CI**, confidence interval; **DF**, degrees of freedom; **RYGB**, Roux-en-Y Gastric Bypass; **SE**, standard error. | | | | | | | |

Supplementary Table : Significant Pairwise Comparisons of Energy Intake from Carbohydrates Differences Between Baseline and Follow-up Time Points Within Cohorts.

The table presents the statistically significant estimated differences in Energy Intake from Carbohydrates (kcal) between baseline and the follow-up time points (1 month, 3 months, 6 months, and 12 months) within the three study groups (Obesity, Normal-Weight, and RYGB). The estimates are derived from a linear mixed model (LMM) with pairwise comparisons performed using estimated marginal means (EMM). The LMM was built with an interaction term between cohort and time point. Significant differences are reported with their corresponding standard errors (SE), degrees of freedom (DF), confidence intervals (lower 95% CI, upper 95% CI), t-ratios, and p-values. The standard errors were estimated using the ordinary least squares (OLS) method, which calculates the variability of the coefficient estimates and residuals by minimizing the sum of the squared differences between the observed and predicted values.

|  | Estimate | SE | DF | Lower  95% CI | Upper  95% CI | t-ratio | p-value |
| --- | --- | --- | --- | --- | --- | --- | --- |
| RYGB 1 month  vs  RYGB Baseline | –169.38 | 32.32 | 220 | –280.26 | –58.49 | –5.240 | **< 0.001** |
| RYGB 3 months  vs  RYGB Baseline | –153.15 | 32.32 | 220 | –264.04 | –42.27 | –4.738 | **< 0.001** |
| RYGB 6 months  vs  RYGB Baseline | –149.80 | 32.32 | 220 | –260.68 | –38.91 | –4.634 | **< 0.001** |
| RYGB 12 months  vs  RYGB Baseline | –123.42 | 32.32 | 220 | –234.31 | –12.54 | –3.818 | **0.014** |
| Abbreviations: **CI**, confidence interval; **DF**, degrees of freedom; **RYGB**, Roux-en-Y Gastric Bypass; **SE**, standard error. | | | | | | | |

Supplementary Table : Significant Pairwise Comparisons of Energy Intake from Carbohydrates Differences Between Baseline and Follow-up Time Points Between Cohorts.

The table presents the statistically significant estimated differences in Energy Intake from Carbohydrates (kcal) between the three study groups (Obesity, Normal-Weight, and RYGB) at each time point (baseline, 1 month, 3 months, 6 months, and 12 months). The estimates are derived from a linear mixed model (LMM) with pairwise comparisons performed using estimated marginal means (EMM). The LMM was built with an interaction term between cohort and time point. Significant differences are reported with their corresponding standard errors (SE), degrees of freedom (DF), confidence intervals (lower 95% CI, upper 95% CI), t-ratios, and p-values. The standard errors were estimated using the ordinary least squares (OLS) method, which calculates the variability of the coefficient estimates and residuals by minimizing the sum of the squared differences between the observed and predicted values.

|  | Estimate | SE | DF | Lower  95% CI | Upper  95% CI | t-ratio | p-value |
| --- | --- | --- | --- | --- | --- | --- | --- |
| RYGB 1 month  vs  Obesity 1 month | –179.89 | 44.46 | 142 | –333.38 | –26.40 | –4.046 | **0.007** |
| RYGB 3 months  vs  Normal-Weight 3 month | –201.71 | 55.86 | 142 | –394.54 | –8.88 | –3.611 | **0.031** |
| RYGB 3 months  vs  Obesity 3 month | –205.10 | 44.46 | 142 | –358.58 | –51.61 | –4.613 | **< 0.001** |
| RYGB 6 months  vs  Normal-Weight 6 month | –197.23 | 55.86 | 142 | –390.06 | –4.40 | –3.531 | **0.039** |
| RYGB 6 months  vs  Obesity 6 month | –224.40 | 44.46 | 142 | –377.88 | –70.91 | –5.047 | **< 0.001** |
| RYGB 12 months  vs  Obesity 12 month | –198.02 | 44.46 | 142 | –351.51 | –44.53 | –4.453 | **0.002** |
| Abbreviations: **CI**, confidence interval; **DF**, degrees of freedom; **RYGB**, Roux-en-Y Gastric Bypass; **SE**, standard error. | | | | | | | |

Supplementary Table : Significant Pairwise Comparisons of Energy Intake from Sugars Differences Between Baseline and Follow-up Time Points Within Cohorts.

The table presents the statistically significant estimated differences in Energy Intake from Sugars (kcal) between baseline and the follow-up time points (1 month, 3 months, 6 months, and 12 months) within the three study groups (Obesity, Normal-Weight, and RYGB). The estimates are derived from a linear mixed model (LMM) with pairwise comparisons performed using estimated marginal means (EMM). The LMM was built with an interaction term between cohort and time point. Significant differences are reported with their corresponding standard errors (SE), degrees of freedom (DF), confidence intervals (lower 95% CI, upper 95% CI), t-ratios, and p-values. The standard errors were estimated using the ordinary least squares (OLS) method, which calculates the variability of the coefficient estimates and residuals by minimizing the sum of the squared differences between the observed and predicted values.

|  | Estimate | SE | DF | Lower  95% CI | Upper  95% CI | t-ratio | p-value |
| --- | --- | --- | --- | --- | --- | --- | --- |
| RYGB 1 month  vs  RYGB Baseline | –57.83 | 12.26 | 220 | –99.89 | –15.78 | –4.718 | **< 0.001** |
| RYGB 3 months  vs  RYGB Baseline | –50.19 | 12.26 | 220 | –92.24 | –8.13 | –4.094 | **0.005** |
| RYGB 6 months  vs  RYGB Baseline | –46.95 | 12.26 | 220 | –89.01 | –4.90 | –3.830 | **0.014** |
| Abbreviations: **CI**, confidence interval; **DF**, degrees of freedom; **RYGB**, Roux-en-Y Gastric Bypass; **SE**, standard error. | | | | | | | |

Supplementary Table : Significant Pairwise Comparisons of Energy Intake from Sugars Differences Between Baseline and Follow-up Time Points Between Cohorts.

The table presents the statistically significant estimated differences in Energy Intake from Sugars (kcal) between the three study groups (Obesity, Normal-Weight, and RYGB) at each time point (baseline, 1 month, 3 months, 6 months, and 12 months). The estimates are derived from a linear mixed model (LMM) with pairwise comparisons performed using estimated marginal means (EMM). The LMM was built with an interaction term between cohort and time point. Significant differences are reported with their corresponding standard errors (SE), degrees of freedom (DF), confidence intervals (lower 95% CI, upper 95% CI), t-ratios, and p-values. The standard errors were estimated using the ordinary least squares (OLS) method, which calculates the variability of the coefficient estimates and residuals by minimizing the sum of the squared differences between the observed and predicted values.

|  | Estimate | SE | DF | Lower  95% CI | Upper  95% CI | t-ratio | p-value |
| --- | --- | --- | --- | --- | --- | --- | --- |
| RYGB 1 month  vs  Normal-Weight 1 month | –85.78 | 21.41 | 139 | –159.72 | –11.85 | –4.007 | **0.008** |
| RYGB 1 month  vs  Obesity 1 month | –97.41 | 17.04 | 139 | –156.26 | –38.56 | –5.716 | **< 0.001** |
| RYGB 3 months  vs  Normal-Weight 3 month | –87.46 | 21.41 | 139 | –161.40 | –13.53 | –4.085 | **0.006** |
| RYGB 3 months  vs  Obesity 3 month | –105.62 | 17.04 | 139 | –164.47 | –46.77 | –6.198 | **< 0.001** |
| RYGB 6 months  vs  Normal-Weight 6 month | –115.97 | 21.41 | 139 | –189.90 | –42.03 | –5.416 | **< 0.001** |
| RYGB 6 months  vs  Obesity 6 month | –93.65 | 17.04 | 139 | –152.50 | –34.80 | –5.495 | **< 0.001** |
| RYGB 12 months  vs  Normal-Weight 12 month | –95.66 | 21.41 | 139 | –169.60 | –21.72 | –4.468 | **0.002** |
| RYGB 12 months  vs  Obesity 12 month | –85.02 | 17.04 | 139 | –143.87 | –26.17 | –4.989 | **< 0.001** |
| Abbreviations: **CI**, confidence interval; **DF**, degrees of freedom; **RYGB**, Roux-en-Y Gastric Bypass; **SE**, standard error. | | | | | | | |

Supplementary Table : Significant Pairwise Comparisons of Energy Intake from Sucrose Differences Between Baseline and Follow-up Time Points Between Cohorts.

The table presents the statistically significant estimated differences in Energy Intake from Sucrose (kcal) between the three study groups (Obesity, Normal-Weight, and RYGB) at each time point (baseline, 1 month, 3 months, 6 months, and 12 months). The estimates are derived from a linear mixed model (LMM) with pairwise comparisons performed using estimated marginal means (EMM). The LMM was built with an interaction term between cohort and time point. Significant differences are reported with their corresponding standard errors (SE), degrees of freedom (DF), confidence intervals (lower 95% CI, upper 95% CI), t-ratios, and p-values. The standard errors were estimated using the ordinary least squares (OLS) method, which calculates the variability of the coefficient estimates and residuals by minimizing the sum of the squared differences between the observed and predicted values.

|  | Estimate | SE | DF | Lower  95% CI | Upper  95% CI | t-ratio | p-value |
| --- | --- | --- | --- | --- | --- | --- | --- |
| RYGB 1 month  vs  Obesity 1 month | –41.63 | 9.06 | 159 | –72.84 | –10.42 | –4.596 | **< 0.001** |
| RYGB 3 months  vs  Obesity 3 month | –42.97 | 9.06 | 159 | –74.18 | –11.75 | –4.743 | **< 0.001** |
| RYGB 6 months  vs  Normal-Weight 6 month | –46.93 | 11.38 | 159 | –86.14 | –7.72 | –4.124 | **0.005** |
| RYGB 6 months  vs  Obesity 6 month | –32.65 | 9.06 | 159 | –63.86 | –1.44 | –3.605 | **0.031** |
| Abbreviations: **CI**, confidence interval; **DF**, degrees of freedom; **RYGB**, Roux-en-Y Gastric Bypass; **SE**, standard error. | | | | | | | |

Supplementary Table : Significant Pairwise Comparisons of Energy Intake from Fats Differences Between Baseline and Follow-up Time Points Between Cohorts.

The table presents the statistically significant estimated differences in Energy Intake from Fats (kcal) between the three study groups (Obesity, Normal-Weight, and RYGB) at each time point (baseline, 1 month, 3 months, 6 months, and 12 months). The estimates are derived from a linear mixed model (LMM) with pairwise comparisons performed using estimated marginal means (EMM). The LMM was built without an interaction term between cohort and time point. Significant differences are reported with their corresponding standard errors (SE), degrees of freedom (DF), confidence intervals (lower 95% CI, upper 95% CI), t-ratios, and p-values. The standard errors were estimated using the ordinary least squares (OLS) method, which calculates the variability of the coefficient estimates and residuals by minimizing the sum of the squared differences between the observed and predicted values.

|  | Estimate | SE | DF | Lower  95% CI | Upper  95% CI | t-ratio | p-value |
| --- | --- | --- | --- | --- | --- | --- | --- |
| RYGB Baseline  vs  Normal-Weight Baseline | –202.86 | 42.06 | 55 | –352.17 | –53.56 | –4.823 | **0.001** |
| RYGB Baseline  vs  Obesity Baseline | –168.28 | 33.48 | 55 | –287.12 | –49.43 | –5.026 | **< 0.001** |
| RYGB 1 month  vs  Normal-Weight 1 month | –202.86 | 42.06 | 55 | –352.17 | –53.56 | –4.823 | **0.001** |
| RYGB 1 month  vs  Obesity 1 month | –168.28 | 33.48 | 55 | –287.12 | –49.43 | –5.026 | **< 0.001** |
| RYGB 3 months  vs  Normal-Weight 3 month | –202.86 | 42.06 | 55 | –352.17 | –53.56 | –4.823 | **0.001** |
| RYGB 3 months  vs  Obesity 3 month | –168.28 | 33.48 | 55 | –287.12 | –49.43 | –5.026 | **< 0.001** |
| RYGB 6 months  vs  Normal-Weight 6 month | –202.86 | 42.06 | 55 | –352.17 | –53.56 | –4.823 | **0.001** |
| RYGB 6 months  vs  Obesity 6 month | –168.28 | 33.48 | 55 | –287.12 | –49.43 | –5.026 | **< 0.001** |
| RYGB 12 months  vs  Normal-Weight 12 month | –202.86 | 42.06 | 55 | –352.17 | –53.56 | –4.823 | **0.001** |
| RYGB 12 months  vs  Obesity 12 month | –168.28 | 33.48 | 55 | –287.12 | –49.43 | –5.026 | **< 0.001** |
| Abbreviations: **CI**, confidence interval; **DF**, degrees of freedom; **RYGB**, Roux-en-Y Gastric Bypass; **SE**, standard error. | | | | | | | |

Supplementary Table : Significant Pairwise Comparisons of Energy Intake from Proteins Differences Between Baseline and Follow-up Time Points Within Cohorts.

The table presents the statistically significant estimated differences in Energy Intake from Proteins (kcal) between baseline and the follow-up time points (1 month, 3 months, 6 months, and 12 months) within the three study groups (Obesity, Normal-Weight, and RYGB). The estimates are derived from a linear mixed model (LMM) with pairwise comparisons performed using estimated marginal means (EMM). The LMM was built with an interaction term between cohort and time point. Significant differences are reported with their corresponding standard errors (SE), degrees of freedom (DF), confidence intervals (lower 95% CI, upper 95% CI), t-ratios, and p-values. The standard errors were estimated using the ordinary least squares (OLS) method, which calculates the variability of the coefficient estimates and residuals by minimizing the sum of the squared differences between the observed and predicted values.

|  | Estimate | SE | DF | Lower  95% CI | Upper  95% CI | t-ratio | p-value |
| --- | --- | --- | --- | --- | --- | --- | --- |
| RYGB 1 month  vs  RYGB Baseline | –22.61 | 4.20 | 220 | –37.03 | –8.20 | –5.381 | **< 0.001** |
| RYGB 3 months  vs  RYGB Baseline | –19.96 | 4.20 | 220 | –34.38 | –5.54 | –4.749 | **< 0.001** |
| RYGB 6 months  vs  RYGB Baseline | –16.85 | 4.20 | 220 | –31.27 | –2.44 | –4.010 | **0.007** |
| RYGB 12 months  vs  RYGB Baseline | –15.32 | 4.20 | 220 | –29.73 | –0.90 | –3.644 | **0.026** |
| Abbreviations: **CI**, confidence interval; **DF**, degrees of freedom; **RYGB**, Roux-en-Y Gastric Bypass; **SE**, standard error. | | | | | | | |

Supplementary Table : Significant Pairwise Comparisons of Energy Intake from Proteins Differences Between Baseline and Follow-up Time Points Between Cohorts.

The table presents the statistically significant estimated differences in Energy Intake from Proteins (kcal) between the three study groups (Obesity, Normal-Weight, and RYGB) at each time point (baseline, 1 month, 3 months, 6 months, and 12 months). The estimates are derived from a linear mixed model (LMM) with pairwise comparisons performed using estimated marginal means (EMM). The LMM was built with an interaction term between cohort and time point. Significant differences are reported with their corresponding standard errors (SE), degrees of freedom (DF), confidence intervals (lower 95% CI, upper 95% CI), t-ratios, and p-values. The standard errors were estimated using the ordinary least squares (OLS) method, which calculates the variability of the coefficient estimates and residuals by minimizing the sum of the squared differences between the observed and predicted values.

|  | Estimate | SE | DF | Lower  95% CI | Upper  95% CI | t-ratio | p-value |
| --- | --- | --- | --- | --- | --- | --- | --- |
| RYGB 1 month  vs  Normal-Weight 1 month | –35.54 | 7.79 | 124 | –62.50 | –8.57 | –4.561 | **0.001** |
| RYGB 1 month  vs  Obesity 1 month | –35.91 | 6.20 | 124 | –57.38 | –14.45 | –5.790 | **< 0.001** |
| RYGB 3 months  vs  Normal-Weight 3 month | –35.66 | 7.79 | 124 | –62.62 | –8.69 | –4.576 | **0.001** |
| RYGB 3 months  vs  Obesity 3 month | –40.11 | 6.20 | 124 | –61.57 | –18.64 | –6.467 | **< 0.001** |
| RYGB 6 months  vs  Normal-Weight 6 month | –44.43 | 7.79 | 124 | –71.40 | –17.46 | –5.702 | **< 0.001** |
| RYGB 6 months  vs  Obesity 6 month | –38.66 | 6.20 | 124 | –60.13 | –17.20 | –6.234 | **< 0.001** |
| RYGB 12 months  vs  Normal-Weight 12 month | –40.17 | 7.79 | 124 | –67.13 | –13.20 | –5.155 | **< 0.001** |
| RYGB 12 months  vs  Obesity 12 month | –37.13 | 6.20 | 124 | –58.59 | –15.66 | –5.986 | **< 0.001** |
| Abbreviations: **CI**, confidence interval; **DF**, degrees of freedom; **RYGB**, Roux-en-Y Gastric Bypass; **SE**, standard error. | | | | | | | |

# Effect of RYGB on Relative Energy Intake from Macronutrients

Supplementary Table : Results of the Analysis of Covariance for Relative Intake of Carbohydrate, Sugar, Sucrose, Fat, and Protein among the three study groups, using the group with obesity as the reference group, when adjusting for baseline values.

The table presents the results of the Analysis of Covariance (ANCOVA) for the relative intake of carbohydrate, sugar, sucrose, fat, and protein (in %kcal) among the three study groups (Obesity, Normal-Weight, and RYGB). The group with obesity is used as the reference group. The baseline values are included in the model as covariate. For each variable, the table reports the estimated differences, standard errors (SE), t-values, p-values, and 95% confidence intervals (CI) for the Normal-Weight and RYGB groups compared to the reference group. Additionally, residual standard error (SE), multiple R-squared (R²), adjusted R², F-statistic (F), and overall p-value for each model are included. The F-statistic is reported with the degrees of freedom between the groups (df1, numerator) and the degrees of freedom within the groups (df2, denominator) as F(df1, df2). The standard errors and residual standard errors were estimated using the ordinary least squares (OLS) method, which calculates the variability of the coefficient estimates and residuals by minimizing the sum of the squared differences between the observed and predicted values. The R-squared (R²) value represents the proportion of the variance in the dependent variable that is explained by the independent variables in the model.

| **Variable** |  | **Estimate** | **SE** | **t value** | **Pr(>|t|)** | **Lower**  **95% CI** | **Upper**  **95% CI** | **Residual**  **SE** | **Multiple**  **R2** | **Adjusted**  **R2** | **F(3, 54)** | **p-value** |
| --- | --- | --- | --- | --- | --- | --- | --- | --- | --- | --- | --- | --- |
| **Carbohydrate**  **(%kcal)** | (Intercept) | 40.28 | 7.69 | 5.239 | < 0.001 |  |  | 21.48 | 0.03 | –0.02 | 0.65 | 0.586 |
| Normal-Weight | –5.07 | 7.85 | –0.646 | 0.521 | –20.81 | 10.67 |
| RYGB | –2.96 | 6.42 | –0.462 | 0.646 | –15.83 | 9.90 |
| Baseline | 0.15 | 0.13 | 1.174 | 0.246 | –0.10 | 0.40 |
| **Sugar**  **(%kcal)** | (Intercept) | 12.20 | 2.82 | 4.323 | < 0.001 |  |  | 3.40 | 0.19 | 0.15 | 4.29 | **0.009** |
| Normal-Weight | 0.82 | 1.46 | 0.566 | 0.573 | –2.09 | 3.74 |
| RYGB | 0.24 | 1.17 | 0.202 | 0.841 | –2.10 | 2.58 |
| Baseline | 0.43 | 0.12 | 3.559 | **< 0.001** | 0.2 | 0.7 |
| **Sucrose**  **(%kcal)** | (Intercept) | 4.17 | 1.26 | 3.318 | 0.002 |  |  | 4.01 | 0.19 | 0.15 | 4.35 | **0.008** |
| Normal-Weight | 0.94 | 1.46 | 0.643 | 0.522 | –1.99 | 3.87 |
| RYGB | 0.42 | 1.17 | 0.354 | 0.725 | –1.94 | 2.77 |
| Baseline | 0.42 | 0.12 | 3.569 | **< 0.001** | 0.2 | 0.6 |
| **Fat**  **(%kcal)** | (Intercept) | 36.45 | 7.10 | 5.136 | < 0.001 |  |  | 21.63 | 0.03 | –0.02 | 0.65 | 0.588 |
| Normal-Weight | 5.14 | 7.91 | 0.650 | 0.519 | –10.71 | 20.99 |
| RYGB | 3.01 | 6.47 | 0.465 | 0.644 | –9.95 | 15.97 |
| Baseline | 0.15 | 0.13 | 1.168 | 0.248 | –0.10 | 0.40 |
| **Protein**  **(%kcal)** | (Intercept) | 7.61 | 1.16 | 6.527 | < 0.001 |  |  | 0.17 | 0.04 | –0.02 | 0.72 | 0.547 |
| Normal-Weight | –0.04 | 0.06 | –0.655 | 0.515 | –0.17 | 0.08 |
| RYGB | –0.02 | 0.05 | –0.431 | 0.669 | –0.12 | 0.08 |
| Baseline | 0.16 | 0.13 | 1.240 | 0.220 | –0.10 | 0.40 |
| Abbreviations: **CI**, confidence interval; **df**, degrees of freedom; **F**, F-statistic with df1 and df2; **R2**, R-squared; **RYGB**, Roux-en-Y Gastric Bypass; **SE**, standard errors. | | | | | | | | | | | | |

Supplementary Table : Results of the Analysis of Variance for relative Intake of Carbohydrate, Sugar, Sucrose, Fat, and Protein among the three study groups, using the group with obesity as the reference group.

The table presents the results of the Analysis of Variance (ANOVA) for the relative intake of carbohydrate, sugar, sucrose, fat, and protein (in %kcal) among the three study groups (Obesity, Normal-Weight, and RYGB). The group with obesity is used as the reference group. For each variable, the table reports the estimated differences, standard errors (SE), t-values, p-values, and 95% confidence intervals (CI) for the Normal-Weight and RYGB groups compared to the reference group. Additionally, residual standard error (SE), multiple R-squared (R²), adjusted R², F-statistic (F), and overall p-value for each model are included. The F-statistic is reported with the degrees of freedom between the groups (df1, numerator) and the degrees of freedom within the groups (df2, denominator) as F(df1, df2). The standard errors and residual standard errors were estimated using the ordinary least squares (OLS) method, which calculates the variability of the coefficient estimates and residuals by minimizing the sum of the squared differences between the observed and predicted values. The R-squared (R²) value represents the proportion of the variance in the dependent variable that is explained by the independent variables in the model.

| **Variable** |  | **Estimate** | **SE** | **t value** | **Pr(>|t|)** | **Lower**  **95% CI** | **Upper**  **95% CI** | **Residual**  **SE** | **Multiple**  **R2** | **Adjusted**  **R2** | **F(2, 55)** | **p-value** |
| --- | --- | --- | --- | --- | --- | --- | --- | --- | --- | --- | --- | --- |
| **Carbohydrate**  **(%kcal)** | (Intercept) | 48.23 | 4.51 | 10.684 | < 0.001 |  |  | 22.12 | 0.08 | 0.05 | 2.36 | 0.104 |
| Normal-Weight | –5.34 | 8.05 | –0.663 | 0.510 | –21.47 | 10.80 |
| RYGB | 10.60 | 6.45 | 1.643 | 0.106 | –2.33 | 23.54 |
| **Sugar**  **(%kcal)** | (Intercept) | 22.38 | 0.91 | 24.563 | < 0.001 |  |  | 4.46 | 0.01 | –0.03 | 0.06 | 0.944 |
| Normal-Weight | –0.42 | 1.62 | –0.259 | 0.796 | –3.68 | 2.84 |
| RYGB | –0.40 | 1.30 | –0.305 | 0.762 | –3.01 | 2.21 |
| **Sucrose**  **(%kcal)** | (Intercept) | 8.19 | 0.95 | 8.644 | < 0.001 |  |  | 4.64 | 0.01 | –0.03 | 0.14 | 0.870 |
| Normal-Weight | –0.30 | 1.69 | –0.180 | 0.858 | –3.69 | 3.08 |
| RYGB | –0.71 | 1.35 | –0.528 | 0.600 | –3.43 | 2.00 |
| **Fat**  **(%kcal)** | (Intercept) | 42.47 | 4.55 | 9.335 | < 0.001 |  |  | 22.29 | 0.08 | 0.05 | 2.4 | 0.103 |
| Normal-Weight | 5.36 | 8.12 | 0.660 | 0.512 | –10.91 | 21.62 |
| RYGB | –10.74 | 6.50 | –1.651 | 0.104 | –23.77 | 2.29 |
| **Protein**  **(%kcal)** | (Intercept) | 9.06 | 0.04 | 248.432 | < 0.001 |  |  | 0.179 | 0.07 | 0.04 | 2.19 | 0.122 |
| Normal-Weight | –0.04 | 0.07 | –0.666 | 0.508 | –0.17 | 0.09 |
| RYGB | 0.08 | 0.05 | 1.563 | 0.124 | –0.02 | 0.19 |
| Abbreviations: **CI**, confidence interval; **F**, F-statistic with df1 and df2; **R2**, R-squared; **RYGB**, Roux-en-Y Gastric Bypass; **SE**, standard errors. | | | | | | | | | | | | | |

Supplementary Table : Measures of relative macronutrient intake of the study group undergoing Roux-en-Y Gastric Bypass (RYGB) surgery over the study period. The months refer to the number of months after RYGB surgery and not after the baseline measurement.

|  | **RYGB** | | | | |
| --- | --- | --- | --- | --- | --- |
|  | **Baseline***  N = 23 | **1 month***  N = 19 | **3 months***  N = 21 | **6 months***  N = 19 | **12 months***  N = 20 |
| **Carbohydrates (%kcal)** | 58.8 (23.5) | 50.1 (21.3) | 48.6 (24.8) | 45.8 (22.6) | 46.4 (21.4) |
| **Sugar (%kcal)** | 22.0 (4.9) | 21.6 (4.5) | 21.2 (4.7) | 21.1 (5.0) | 21.9 (4.1) |
| **Sucrose (%kcal)** | 7.5 (4.9) | 7.3 (4.5) | 6.9 (4.7) | 6.9 (4.6) | 7.7 (4.3) |
| **Fat (%kcal)** | 31.7 (23.7) | 40.5 (21.5) | 42.0 (24.9) | 44.8 (22.8) | 44.3 (21.5) |
| **Protein (%kcal)** | 9.1 (0.2) | 9.1 (0.2) | 9.1 (0.2) | 9.0 (0.2) | 9.0 (0.2) |
| Abbreviations: **%kcal**, percentage of total energy intake in kcal; **RYGB**, Roux-en-Y Gastric Bypass.  *** Mean (SD). SD, standard deviation. | | | | | |

Supplementary Table : Changes of relative energy intake from macronutrients of the study group undergoing Roux-en-Y Gastric Bypass (RYGB) surgery over the study period.

|  | **Study Visit** | | **Difference*#*** | **p-value*†*** |
| --- | --- | --- | --- | --- |
|  | **Baseline***  N = 23 | **End of follow-up***  N = 20 |
| **Carbohydrates (%kcal)** | 58.8 (23.5) | 46.4 (21.4) | –12.5  (–26.0, 0.9) | 0.066 |
| **Sugar (%kcal)** | 22.0 (4.9) | 21.9 (4.1) | –0.1  (–2.8, 2.6) | > 0.900 |
| **Sucrose (%kcal)** | 7.5 (4.9) | 7.7 (4.3) | 0.2  (–2.5, 3.0) | 0.900 |
| **Fat (%kcal)** | 31.7 (23.7) | 44.3 (21.5) | 12.6  (–0.9, 26.0) | 0.066 |
| **Protein (%kcal)** | 9.1 (0.2) | 9.0 (0.2) | –0.1  (–0.2, 0.0) | 0.068 |
| Abbreviations: **%kcal**, percentage of total energy intake in kcal.  *** Mean (SD) or Frequency (%). SD, standard deviation; %, percentage. *†* Wilcoxon rank sum test; Wilcoxon rank sum exact test; Fisher's exact test  *#* 95 % Confidence Interval. | | | | |

Supplementary Table : Measures of relative energy intake from macronutrients of the study group with obesity over the study period.

|  | **Obesity** | | | | |
| --- | --- | --- | --- | --- | --- |
|  | **Baseline***  N = 24 | **1 month***  N = 0 | **3 months***  N = 22 | **6 months***  N = 22 | **12 months***  N = 0 |
| **Carbohydrates (kcal)** | 48.2 (22.7) | – | 46.9 (21.5) | 47.7 (23.2) | – |
| **Sugar (kcal)** | 22.4 (4.5) | – | 23.1 (4.5) | 21.8 (4.7) | – |
| **Sucrose (kcal)** | 8.2 (4.9) | – | 8.9 (4.5) | 7.6 (4.6) | – |
| **Fat (kcal)** | 42.5 (22.9) | – | 43.8 (21.6) | 42.9 (23.3) | – |
| **Protein (kcal)** | 9.1 (0.2) | – | 9.0 (0.2) | 9.0 (0.2) | – |
| Abbreviation: **%kcal**, percentage of total energy intake in kcal.  *** Mean (SD). SD, standard deviation. | | | | | |

Supplementary Table : Changes of relative energy intake from macronutrients of the study group with obesity over the study period.

|  | **Study Visit** | | **Difference*#*** | **p-value†** |
| --- | --- | --- | --- | --- |
|  | **Baseline***  N = 24 | **End of follow-up***  N = 22 |
| **Carbohydrates (kcal)** | 48.2 (22.7) | 47.7 (23.2) | –0.5  (–14.0, 13.0) | > 0.9 |
| **Sugar (kcal)** | 22.4 (4.5) | 21.8 (4.7) | –0.6  (–3.2, 2.1) | 0.7 |
| **Sucrose (kcal)** | 8.2 (4.9) | 7.6 (4.6) | –0.6  (–3.4, 2.1) | 0.7 |
| **Fat (kcal)** | 42.5 (22.9) | 42.9 (23.3) | 0.5  (–13.0, 14.0) | > 0.9 |
| **Protein (kcal)** | 9.1 (0.2) | 9.0 (0.2) | 0.0  (–0.1, 0.1) | 0.9 |
| *** Mean (SD) or Frequency (%). SD, standard deviation; %, percentage. *†* Wilcoxon rank sum test; Wilcoxon rank sum exact test; Fisher's exact test  *#* 95 % Confidence Interval. | | | | |

Supplementary Table : Measures of relative energy intake from macronutrients of the study group with normal weight over the study period.

|  | **Normal-Weight** | | | | |
| --- | --- | --- | --- | --- | --- |
|  | **Baseline***  N = 11 | **1 month***  N = 0 | **3 months***  N = 11 | **6 months***  N = 10 | **12 months***  N = 10 |
| **Carbohydrates (kcal)** | 42.9 (17.2) | – | 48.8 (21.7) | 42.6 (18.9) | 41.8 (17.7) |
| **Sugar (kcal)** | 22.0 (3.2) | – | 22.3 (4.1) | 22.9 (4.7) | 22.5 (4.3) |
| **Sucrose (kcal)** | 7.9 (3.4) | – | 8.0 (4.1) | 8.9 (4.6) | 8.4 (4.3) |
| **Fat (kcal)** | 47.8 (17.3) | – | 41.8 (21.9) | 48.1 (19.0) | 48.9 (17.8) |
| **Protein (kcal)** | 9.0 (0.1) | – | 9.1 (0.2) | 9.0 (0.1) | 9.0 (0.1) |
| *** Mean (SD). SD, standard deviation. | | | | | |

Supplementary Table : Changes of relative energy intake from macronutrients of the study group with normal weight over the study period.

|  | **Study Visit** | | **Difference*#*** | **p-value†** |
| --- | --- | --- | --- | --- |
|  | **Baseline***  N = 11* | **End of follow-up***  N = 10* |
| **Carbohydrates (kcal)** | 42.9 (17.2) | 41.8 (17.7) | –1.1  (–17.0, 14.0) | 0.9 |
| **Sugar (kcal)** | 22.0 (3.2) | 22.5 (4.3) | 0.5  (–2.9, 3.9) | 0.8 |
| **Sucrose (kcal)** | 7.9 (3.4) | 8.4 (4.3) | 0.5  (–2.9, 4.0) | 0.8 |
| **Fat (kcal)** | 47.8 (17.3) | 48.9 (17.8) | 1.1  (–15.0, 17.0) | 0.9 |
| **Protein (kcal)** | 9.0 (0.1) | 9.0 (0.1) | 0.0  (–0.1, 0.1) | 0.8 |
| *** Mean (SD) or Frequency (%). SD, standard deviation; %, percentage. *†* Wilcoxon rank sum test; Wilcoxon rank sum exact test; Fisher's exact test  *#* 95 % Confidence Interval. | | | | |

# Linear Relationship between Weight Loss and Energy Intake from Sugars

Supplementary Table : Results of Linear Correlation Analysis for Weight Loss and Energy Intake from Sugars in the study group undergoing Roux-en-Y Gastric Bypass (RYGB) surgery.

The table presents the results of the linear correlation analysis for weight loss throughout the follow-up and energy intake from sugars (sucrose and other sugars) in the study group undergoing Roux-en-Y Gastric Bypass (RYGB) surgery. For each time frame, the table reports the number of complete cases (N), the Pearson correlation coefficients (r), p-values (Pr(>|t|)), and confidence intervals of the coefficient (lower and upper 95% CI). The r-squared (r²) value, or coefficient of determination, represents the proportion of the variance in the dependent variable that is explained by the independent variables in the model.

| **Variable** | **Sugar**  **Intake** | **N** | **r** | **Pr(>|t|)** | **Lower**  **95% CI** | **Upper**  **95% CI** | **r2** | |
| --- | --- | --- | --- | --- | --- | --- | --- | --- |
| **%EBMIL**  **at 1 month** | *at Baseline* | 22 | -0.36 | 0.143 | -0.71 | 0.13 | 12.9% | |
| *at 1 month* | 18 | 0.05 | 0.835 | -0.42 | 0.51 | 0.3% | |
| **%EBMIL**  **at 3 months** | *at Baseline* | 22 | 0.19 | 0.412 | -0.27 | 0.59 | 3.8% | |
| *at 1 month* | 18 | 0.51 | 0.036 | 0.04 | 0.80 | 26.2% | |
| *at 3 months* | 20 | 0.32 | 0.175 | -0.15 | 0.67 | 10.0% | |
| **%EBMIL**  **at 6 months** | *at Baseline* | 22 | -0.01 | 0.966 | -0.48 | 0.46 | 0.0% | |
| *at 1 month* | 18 | 0.08 | 0.746 | -0.41 | 0.54 | 0.7% | |
| *at 3 months* | 20 | 0.14 | 0.592 | -0.37 | 0.58 | 2.0% | |
| *at 6 months* | 18 | -0.27 | 0.279 | -0.65 | 0.23 | 7.3% | |
| **%EBMIL**  **at 12 months** | *at Baseline* | 22 | 0.07 | 0.787 | -0.40 | 0.51 | 0.4% | |
| *at 1 month* | 18 | 0.22 | 0.395 | -0.29 | 0.63 | 4.9% | |
| *at 3 months* | 20 | 0.29 | 0.249 | -0.21 | 0.66 | 8.2% | |
| *at 6 months* | 18 | -0.04 | 0.868 | -0.50 | 0.43 | 0.2% | |
| *at 12 months* | 19 | 0.20 | 0.418 | -0.28 | 0.60 | 3.9% | |
| Abbreviations: **CI**, confidence interval; **r**, Pearson correlation coefficient; **R2**, Coefficient of determination; **%EBMIL**, Percentage Excess Body Mass Index Loss. | | | | | | | |  |

Supplementary Table : Results of Linear Correlation Analysis for Weight Loss and Decrease in Energy Intake from Sugars Compared to Baseline in the study group undergoing Roux-en-Y Gastric Bypass (RYGB) surgery.

The table presents the results of the linear correlation analysis for weight loss throughout the follow-up and decrease in energy intake from sugars (sucrose and other sugars) compared to baseline in the study group undergoing Roux-en-Y Gastric Bypass (RYGB) surgery. For each time frame, the table reports the number of complete cases (N), the Pearson correlation coefficients (r), p-values (Pr(>|t|)), and confidence intervals of the coefficient (lower and upper 95% CI). The r-squared (r²) value, or coefficient of determination, represents the proportion of the variance in the dependent variable that is explained by the independent variables in the model.

| **Variable** | **Decreased**  **Sugar**  **Intake** | **N** | **r** | **Pr(>|t|)** | **Lower**  **95% CI** | **Upper**  **95% CI** | **r2** | |
| --- | --- | --- | --- | --- | --- | --- | --- | --- |
| **%EBMIL**  **at 1 month** | *at 1 month* | 18 | 0.38 | 0.120 | -0.11 | 0.72 | 14.4% | |
| **%EBMIL**  **at 3 months** | *at 1 month* | 18 | -0.02 | 0.940 | -0.50 | 0.47 | 0.0% | |
| *at 3 months* | 20 | 0.00 | 0.984 | -0.44 | 0.45 | 0.0% | |
| **%EBMIL**  **at 6 months** | *at 1 month* | 18 | 0.08 | 0.773 | -0.42 | 0.54 | 0.6% | |
| *at 3 months* | 20 | -0.05 | 0.836 | -0.52 | 0.44 | 0.3% | |
| *at 6 months* | 18 | -0.05 | 0.837 | -0.51 | 0.42 | 0.3% | |
| **%EBMIL**  **at 12 months** | *at 1 month* | 18 | 0.01 | 0.967 | -0.47 | 0.49 | 0.0% | |
| *at 3 months* | 20 | 0.04 | 0.877 | -0.44 | 0.50 | 0.2% | |
| *at 6 months* | 18 | -0.09 | 0.726 | -0.53 | 0.39 | 0.8% | |
| *at 12 months* | 19 | 0.03 | 0.915 | -0.43 | 0.47 | 0.1% | |
| Abbreviations: **CI**, confidence interval; **r**, Pearson correlation coefficient; **R2**, Coefficient of determination; **%EBMIL**, Percentage Excess Body Mass Index Loss. | | | | | | | |  |

Supplementary Table : Results of Partial Correlation Analysis for Weight Loss and Energy Intake from Sugars Adjusted for Basal Metabolic Rate (BMR) in the study group undergoing Roux-en-Y Gastric Bypass (RYGB) surgery.

The table presents the results of the partial correlation analysis for weight loss throughout the follow-up and energy intake from sugars (sucrose and other sugars) adjusted for Basal Metabolic Rate (BMR) in the study group undergoing Roux-en-Y Gastric Bypass (RYGB) surgery. The partial correlations were calculated by fitting linear models to control for BMR, extracting the residuals, and computing the correlation of these residuals. For each time frame, the table reports the number of complete cases (N), the partial correlation coefficients (partial r), and p-values (Pr(>|t|)). The standard errors and residual standard errors were estimated using the ordinary least squares (OLS) method, which calculates the variability of the coefficient estimates and residuals by minimizing the sum of the squared differences between the observed and predicted values. The adjusted r-squared (r²) value, or coefficient of determination, represents the proportion of the variance in the dependent variable that is explained by the independent variables in the model.

| **Variable** | **Sugar**  **Intake** | **N** | **Partial *r*** | **Pr(>|t|)** | **Adjusted *r2*** | |
| --- | --- | --- | --- | --- | --- | --- |
| **%EBMIL**  **at 1 month** | *at Baseline* | 22 | -0.41 | 0.092 | 16.8% | |
| *at 1 month* | 18 | -0.06 | 0.811 | 0.4% | |
| **%EBMIL**  **at 3 months** | *at Baseline* | 22 | -0.22 | 0.406 | 4.7% | |
| *at 1 month* | 18 | -0.17 | 0.504 | 3.0% | |
| *at 3 months* | 20 | -0.14 | 0.598 | 1.9% | |
| **%EBMIL**  **at 6 months** | *at Baseline* | 22 | 0.03 | 0.907 | 0.1% | |
| *at 1 month* | 18 | 0.45 | 0.069 | 20.4% | |
| *at 3 months* | 20 | 0.37 | 0.106 | 13.8% | |
| *at 6 months* | 18 | 0.16 | 0.551 | 2.4% | |
| **%EBMIL**  **at 12 months** | *at Baseline* | 22 | 0.17 | 0.502 | 2.9% | |
| *at 1 month* | 18 | -0.06 | 0.802 | 0.4% | |
| *at 3 months* | 20 | 0.03 | 0.898 | 0.1% | |
| *at 6 months* | 18 | 0.12 | 0.658 | 1.3% | |
| *at 12 months* | 19 | 0.06 | 0.815 | 0.4% | |
| Abbreviations: **r**, Pearson correlation coefficient; **r2**, Coefficient of determination; **%EBMIL**, Percentage Excess Body Mass Index Loss. | | | | | |  | |

Supplementary Table : Results of Partial Correlation Analysis for Weight Loss and Decrease in Energy Intake from Sugars Compared to Baseline Adjusted for Basal Metabolic Rate (BMR) in the study group undergoing Roux-en-Y Gastric Bypass (RYGB) surgery.

The table presents the results of the partial correlation analysis for weight loss throughout the follow-up and decrease in energy intake from sugars (sucrose and other sugars) compared to baseline adjusted for Basal Metabolic Rate (BMR) in the study group undergoing Roux-en-Y Gastric Bypass (RYGB) surgery. The partial correlations were calculated by fitting linear models to control for BMR, extracting the residuals, and computing the correlation of these residuals. For each time frame, the table reports the number of complete cases (N), the partial correlation coefficients (partial r), and p-values (Pr(>|t|)). The standard errors and residual standard errors were estimated using the ordinary least squares (OLS) method, which calculates the variability of the coefficient estimates and residuals by minimizing the sum of the squared differences between the observed and predicted values. The adjusted r-squared (r²) value, or coefficient of determination, represents the proportion of the variance in the dependent variable that is explained by the independent variables in the model.

| **Variable** | **Decreased**  **Sugar**  **Intake** | **N** | **Partial *r*** | **Pr(>|t|)** | **Adjusted *r2*** | |
| --- | --- | --- | --- | --- | --- | --- |
| **%EBMIL**  **at 1 month** | *at 1 month* | 18 | 0.41 | 0.089 | 17.0% | |
| **%EBMIL**  **at 3 months** | *at 1 month* | 18 | 0.11 | 0.673 | 1.2% | |
| *at 3 months* | 20 | 0.43 | 0.086 | 18.3% | |
| **%EBMIL**  **at 6 months** | *at 1 month* | 18 | 0.41 | 0.102 | 16.8% | |
| *at 3 months* | 20 | 0.07 | 0.775 | 0.6% | |
| *at 6 months* | 18 | 0.23 | 0.336 | 5.1% | |
| **%EBMIL**  **at 12 months** | *at 1 month* | 18 | -0.08 | 0.773 | 0.6% | |
| *at 3 months* | 20 | 0.03 | 0.891 | 0.1% | |
| *at 6 months* | 18 | 0.08 | 0.769 | 0.6% | |
| *at 12 months* | 19 | 0.03 | 0.917 | 0.1% | |
| Abbreviations: **r**, Pearson correlation coefficient; **r2**, Coefficient of determination; **%EBMIL**, Percentage Excess Body Mass Index Loss. | | | | | |  |

# Linear Relationship between Weight Loss and Carbohydrate and Energy Intake from Sucrose

Supplementary Table : Results of Linear Correlation Analysis for Weight Loss and Energy Intake from Carbohydrates in the study group undergoing Roux-en-Y Gastric Bypass (RYGB) surgery.

The table presents the results of the linear correlation analysis for weight loss throughout the follow-up and energy intake from carbohydrates (complex carbohydrate, sucrose, and other sugars) in the study group undergoing Roux-en-Y Gastric Bypass (RYGB) surgery. For each time frame, the table reports the number of complete cases (N), the Pearson correlation coefficients (r), p-values (Pr(>|t|)), and confidence intervals of the coefficient (lower and upper 95% CI). The r-squared (r²) value, or coefficient of determination, represents the proportion of the variance in the dependent variable that is explained by the independent variables in the model.

| **Variable** | **Carbohydrate**  **Intake** | **N** | **r** | **Pr(>|t|)** | **Lower**  **95% CI** | **Upper**  **95% CI** | **r2** | |
| --- | --- | --- | --- | --- | --- | --- | --- | --- |
| **%EBMIL**  **at 1 month** | *at Baseline* | 22 | -0.32 | 0.199 | -0.68 | 0.18 | 10.10% | |
| *at 1 month* | 18 | -0.11 | 0.658 | -0.55 | 0.37 | 1.30% | |
| **%EBMIL**  **at 3 months** | *at Baseline* | 22 | 0.31 | 0.184 | -0.15 | 0.66 | 9.60% | |
| *at 1 month* | 18 | 0.06 | 0.818 | -0.43 | 0.53 | 0.40% | |
| *at 3 months* | 20 | 0.19 | 0.421 | -0.28 | 0.58 | 3.60% | |
| **%EBMIL**  **at 6 months** | *at Baseline* | 22 | 0.11 | 0.65 | -0.37 | 0.55 | 1.30% | |
| *at 1 month* | 18 | -0.26 | 0.304 | -0.66 | 0.25 | 7.00% | |
| *at 3 months* | 20 | 0.04 | 0.88 | -0.45 | 0.51 | 0.20% | |
| *at 6 months* | 18 | -0.39 | 0.114 | -0.72 | 0.1 | 14.90% | |
| **%EBMIL**  **at 12 months** | *at Baseline* | 22 | 0.21 | 0.382 | -0.27 | 0.61 | 4.50% | |
| *at 1 month* | 18 | -0.12 | 0.658 | -0.57 | 0.39 | 1.30% | |
| *at 3 months* | 20 | 0.13 | 0.597 | -0.36 | 0.57 | 1.80% | |
| *at 6 months* | 18 | -0.05 | 0.847 | -0.5 | 0.43 | 0.20% | |
| *at 12 months* | 19 | 0.33 | 0.174 | -0.15 | 0.68 | 10.60% | |
| Abbreviations: **CI**, confidence interval; **r**, Pearson correlation coefficient; **R2**, Coefficient of determination; **%EBMIL**, Percentage Excess Body Mass Index Loss. | | | | | | | |  |

Supplementary Table : Results of Linear Correlation Analysis for Weight Loss and Energy Intake from Sucrose in the study group undergoing Roux-en-Y Gastric Bypass (RYGB) surgery.

The table presents the results of the linear correlation analysis for weight loss throughout the follow-up and energy intake from sucrose in the study group undergoing Roux-en-Y Gastric Bypass (RYGB) surgery. For each time frame, the table reports the number of complete cases (N), the Pearson correlation coefficients (r), p-values (Pr(>|t|)), and confidence intervals of the coefficient (lower and upper 95% CI). The r-squared (r²) value, or coefficient of determination, represents the proportion of the variance in the dependent variable that is explained by the independent variables in the model.

| **Variable** | **Sucrose**  **Intake** | **N** | **r** | **Pr(>|t|)** | **Lower**  **95% CI** | **Upper**  **95% CI** | **r2** | |
| --- | --- | --- | --- | --- | --- | --- | --- | --- |
| **%EBMIL**  **at 1 month** | *at Baseline* | 22 | -0.28 | 0.258 | -0.66 | 0.21 | 7.9% | |
| *at 1 month* | 18 | 0.31 | 0.210 | -0.18 | 0.68 | 9.6% | |
| **%EBMIL**  **at 3 months** | *at Baseline* | 22 | 0.20 | 0.394 | -0.26 | 0.59 | 4.1% | |
| *at 1 month* | 18 | 0.52 | 0.034 | 0.05 | 0.80 | 26.6% | |
| *at 3 months* | 20 | 0.42 | 0.062 | -0.02 | 0.73 | 18.0% | |
| **%EBMIL**  **at 6 months** | *at Baseline* | 22 | 0.01 | 0.972 | -0.46 | 0.47 | 0.0% | |
| *at 1 month* | 18 | 0.00 | 0.997 | -0.48 | 0.48 | 0.0% | |
| *at 3 months* | 20 | 0.21 | 0.416 | -0.30 | 0.63 | 4.5% | |
| *at 6 months* | 18 | -0.32 | 0.196 | -0.68 | 0.17 | 10.2% | |
| **%EBMIL**  **at 12 months** | *at Baseline* | 22 | 0.10 | 0.675 | -0.37 | 0.53 | 1.1% | |
| *at 1 month* | 18 | 0.17 | 0.509 | -0.34 | 0.60 | 3.0% | |
| *at 3 months* | 20 | 0.40 | 0.096 | -0.08 | 0.73 | 16.4% | |
| *at 6 months* | 18 | 0.06 | 0.814 | -0.42 | 0.51 | 0.4% | |
| *at 12 months* | 19 | 0.15 | 0.538 | -0.33 | 0.57 | 2.3% | |
| Abbreviations: **CI**, confidence interval; **r**, Pearson correlation coefficient; **R2**, Coefficient of determination; **%EBMIL**, Percentage Excess Body Mass Index Loss. | | | | | | | |  |

Supplementary Table : Results of Linear Correlation Analysis for Weight Loss and Decrease in Energy Intake from Carbohydrates compared to Baseline in the study group undergoing Roux-en-Y Gastric Bypass (RYGB) surgery.

The table presents the results of the linear correlation analysis for weight loss throughout the follow-up and decrease in energy intake from carbohydrates (complex carbohydrate, sucrose, and other sugars) compared to baseline in the study group undergoing Roux-en-Y Gastric Bypass (RYGB) surgery. For each time frame, the table reports the number of complete cases (N), the Pearson correlation coefficients (r), p-values (Pr(>|t|)), and confidence intervals of the coefficient (lower and upper 95% CI). The r-squared (r²) value, or coefficient of determination, represents the proportion of the variance in the dependent variable that is explained by the independent variables in the model.

| **Variable** | **Decreased**  **Carbohydrate**  **Intake** | **N** | **r** | **Pr(>|t|)** | **Lower**  **95% CI** | **Upper**  **95% CI** | **r2** | |
| --- | --- | --- | --- | --- | --- | --- | --- | --- |
| **%EBMIL**  **at 1 month** | *at 1 month* | 18 | 0.23 | 0.337 | –0.25 | 0.62 | 5.4% | |
| **%EBMIL**  **at 3 months** | *at 1 month* | 18 | 0.31 | 0.205 | -0.18 | 0.68 | 9.8% | |
| *at 3 months* | 20 | -0.29 | 0.261 | -0.68 | 0.22 | 8.3% | |
| **%EBMIL**  **at 6 months** | *at 1 month* | 18 | -0.24 | 0.303 | -0.62 | 0.22 | 5.9% | |
| *at 3 months* | 20 | -0.14 | 0.598 | -0.58 | 0.37 | 1.9% | |
| *at 6 months* | 18 | -0.25 | 0.328 | -0.65 | 0.26 | 6.4% | |
| **%EBMIL**  **at 12 months** | *at 1 month* | 18 | -0.20 | 0.430 | -0.61 | 0.30 | 3.9% | |
| *at 3 months* | 20 | -0.20 | 0.445 | -0.62 | 0.31 | 3.9% | |
| *at 6 months* | 18 | -0.25 | 0.321 | -0.64 | 0.25 | 6.2% | |
| *at 12 months* | 19 | -0.21 | 0.402 | -0.62 | 0.28 | 4.4% | |
| Abbreviations: **CI**, confidence interval; **r**, Pearson correlation coefficient; **R2**, Coefficient of determination; **%EBMIL**, Percentage Excess Body Mass Index Loss. | | | | | | | |  |

Supplementary Table : Results of Linear Correlation Analysis for Weight Loss and Decrease in Energy Intake from Sucrose Compared to Baseline in the study group undergoing Roux-en-Y Gastric Bypass (RYGB) surgery.

The table presents the results of the linear correlation analysis for weight loss throughout the follow-up and decrease in energy intake from sucrose compared to baseline in the study group undergoing Roux-en-Y Gastric Bypass (RYGB) surgery. For each time frame, the table reports the number of complete cases (N), the Pearson correlation coefficients (r), p-values (Pr(>|t|)), and confidence intervals of the coefficient (lower and upper 95% CI). The r-squared (r²) value, or coefficient of determination, represents the proportion of the variance in the dependent variable that is explained by the independent variables in the model.

| **Variable** | **Decreased**  **Sucrose**  **Intake** | **N** | **r** | **Pr(>|t|)** | **Lower**  **95% CI** | **Upper**  **95% CI** | **r2** | |
| --- | --- | --- | --- | --- | --- | --- | --- | --- |
| **%EBMIL**  **at 1 month** | *at 1 month* | 18 | 0.39 | 0.112 | -0.10 | 0.72 | 15.0% | |
| **%EBMIL**  **at 3 months** | *at 1 month* | 18 | -0.03 | 0.920 | -0.50 | 0.46 | 0.1% | |
| *at 3 months* | 20 | 0.12 | 0.608 | -0.34 | 0.54 | 1.5% | |
| **%EBMIL**  **at 6 months** | *at 1 month* | 18 | 0.05 | 0.858 | -0.44 | 0.52 | 0.2% | |
| *at 3 months* | 20 | -0.01 | 0.981 | -0.49 | 0.48 | 0.0% | |
| *at 6 months* | 18 | -0.09 | 0.725 | -0.53 | 0.39 | 0.8% | |
| **%EBMIL**  **at 12 months** | *at 1 month* | 18 | -0.04 | 0.869 | -0.51 | 0.45 | 0.2% | |
| *at 3 months* | 20 | 0.11 | 0.672 | -0.38 | 0.55 | 1.2% | |
| *at 6 months* | 18 | -0.13 | 0.617 | -0.56 | 0.36 | 1.6% | |
| *at 12 months* | 19 | -0.03 | 0.896 | -0.48 | 0.43 | 0.1% | |
| Abbreviations: **CI**, confidence interval; **r**, Pearson correlation coefficient; **R2**, Coefficient of determination; **%EBMIL**, Percentage Excess Body Mass Index Loss. | | | | | | | |  |

Supplementary Table : Results of Partial Correlation Analysis for Weight Loss and Energy Intake from Carbohydrates Adjusted for Basal Metabolic Rate (BMR) in the study group undergoing Roux-en-Y Gastric Bypass (RYGB) surgery.

The table presents the results of the partial correlation analysis for weight loss throughout the follow-up and energy intake from carbohydrates (complex carbohydrate, sucrose, and other sugars) adjusted for Basal Metabolic Rate (BMR) in the study group undergoing Roux-en-Y Gastric Bypass (RYGB) surgery. The partial correlations were calculated by fitting linear models to control for BMR, extracting the residuals, and computing the correlation of these residuals. For each time frame, the table reports the number of complete cases (N), the partial correlation coefficients (partial r), and p-values (Pr(>|t|)). The standard errors and residual standard errors were estimated using the ordinary least squares (OLS) method, which calculates the variability of the coefficient estimates and residuals by minimizing the sum of the squared differences between the observed and predicted values. The adjusted r-squared (r²) value, or coefficient of determination, represents the proportion of the variance in the dependent variable that is explained by the independent variables in the model.

| **Variable** | **Carbohydrate**  **Intake** | **N** | **Partial *r*** | **Pr(>|t|)** | **Adjusted *r2*** | |
| --- | --- | --- | --- | --- | --- | --- |
| **%EBMIL**  **at 1 month** | *at Baseline* | 22 | -0.34 | 0.165 | 11.7% | |
| *at 1 month* | 18 | -0.13 | 0.613 | 1.6% | |
| **%EBMIL**  **at 3 months** | *at Baseline* | 22 | 0.23 | 0.336 | 5.2% | |
| *at 1 month* | 18 | 0.07 | 0.785 | 0.5% | |
| *at 3 months* | 20 | 0.17 | 0.480 | 2.8% | |
| **%EBMIL**  **at 6 months** | *at Baseline* | 22 | 0.09 | 0.712 | 0.9% | |
| *at 1 month* | 18 | -0.27 | 0.297 | 7.2% | |
| *at 3 months* | 20 | -0.04 | 0.887 | 0.1% | |
| *at 6 months* | 18 | -0.10 | 0.701 | 0.9% | |
| **%EBMIL**  **at 12 months** | *at Baseline* | 22 | 0.19 | 0.431 | 3.7% | |
| *at 1 month* | 18 | -0.12 | 0.658 | 1.3% | |
| *at 3 months* | 20 | 0.11 | 0.657 | 1.3% | |
| *at 6 months* | 18 | 0.22 | 0.391 | 4.6% | |
| *at 12 months* | 19 | 0.36 | 0.132 | 12.9% | |
| Abbreviations: **r**, Pearson correlation coefficient; **r2**, Coefficient of determination; **%EBMIL**, Percentage Excess Body Mass Index Loss. | | | | | |  | |

Supplementary Table : Results of Partial Correlation Analysis for Weight Loss and Energy Intake from Sucrose Adjusted for Basal Metabolic Rate (BMR) in the study group undergoing Roux-en-Y Gastric Bypass (RYGB) surgery.

The table presents the results of the partial correlation analysis for weight loss throughout the follow-up and energy intake from sucrose adjusted for Basal Metabolic Rate (BMR) in the study group undergoing Roux-en-Y Gastric Bypass (RYGB) surgery. The partial correlations were calculated by fitting linear models to control for BMR, extracting the residuals, and computing the correlation of these residuals. For each time frame, the table reports the number of complete cases (N), the partial correlation coefficients (partial r), and p-values (Pr(>|t|)). The standard errors and residual standard errors were estimated using the ordinary least squares (OLS) method, which calculates the variability of the coefficient estimates and residuals by minimizing the sum of the squared differences between the observed and predicted values. The adjusted r-squared (r²) value, or coefficient of determination, represents the proportion of the variance in the dependent variable that is explained by the independent variables in the model.

| **Variable** | **Sucrose**  **Intake** | **N** | **Partial *r*** | **Pr(>|t|)** | **Adjusted *r2*** | |
| --- | --- | --- | --- | --- | --- | --- |
| **%EBMIL**  **at 1 month** | *at Baseline* | 22 | -0.31 | 0.099 | 20.4% | |
| *at 1 month* | 18 | 0.20 | 0.041 | 41.8% | |
| **%EBMIL**  **at 3 months** | *at Baseline* | 22 | 0.09 | 0.008 | 70.7% | |
| *at 1 month* | 18 | 0.44 | 0.190 | 8.0% | |
| *at 3 months* | 20 | 0.48 | 0.233 | 3.1% | |
| **%EBMIL**  **at 6 months** | *at Baseline* | 22 | -0.03 | 0.001 | 91.2% | |
| *at 1 month* | 18 | -0.08 | 0.006 | 77.3% | |
| *at 3 months* | 20 | 0.20 | 0.039 | 44.9% | |
| *at 6 months* | 18 | 0.02 | 0.000 | 93.2% | |
| **%EBMIL**  **at 12 months** | *at Baseline* | 22 | 0.09 | 0.008 | 72.3% | |
| *at 1 month* | 18 | 0.17 | 0.029 | 51.6% | |
| *at 3 months* | 20 | 0.41 | 0.168 | 9.2% | |
| *at 6 months* | 18 | 0.38 | 0.146 | 11.8% | |
| *at 12 months* | 19 | 0.20 | 0.039 | 41.8% | |
| Abbreviations: **r**, Pearson correlation coefficient; **r2**, Coefficient of determination; **%EBMIL**, Percentage Excess Body Mass Index Loss. | | | | | |  | |

Supplementary Table : Results of Partial Correlation Analysis for Weight Loss and Decrease in Energy Intake from Carbohydrates Compared to Baseline Adjusted for Basal Metabolic Rate (BMR) in the study group undergoing Roux-en-Y Gastric Bypass (RYGB) surgery.

The table presents the results of the partial correlation analysis for weight loss throughout the follow-up and energy intake from carbohydrates (complex carbohydrate, sucrose, and other sugars) adjusted for Basal Metabolic Rate (BMR) in the study group undergoing Roux-en-Y Gastric Bypass (RYGB) surgery. The partial correlations were calculated by fitting linear models to control for BMR, extracting the residuals, and computing the correlation of these residuals. For each time frame, the table reports the number of complete cases (N), the partial correlation coefficients (partial r), and p-values (Pr(>|t|)). The standard errors and residual standard errors were estimated using the ordinary least squares (OLS) method, which calculates the variability of the coefficient estimates and residuals by minimizing the sum of the squared differences between the observed and predicted values. The adjusted r-squared (r²) value, or coefficient of determination, represents the proportion of the variance in the dependent variable that is explained by the independent variables in the model.

| **Variable** | **Decreased**  **Carbohydrate**  **Intake** | **N** | **Partial *r*** | **Pr(>|t|)** | **Adjusted *r2*** | |
| --- | --- | --- | --- | --- | --- | --- |
| **%EBMIL**  **at 1 month** | *at 1 month* | 18 | 0.32 | 0.189 | 10.5% | |
| **%EBMIL**  **at 3 months** | *at 1 month* | 18 | -0.26 | 0.307 | 6.9% | |
| *at 3 months* | 20 | -0.19 | 0.430 | 3.5% | |
| **%EBMIL**  **at 6 months** | *at 1 month* | 18 | -0.15 | 0.566 | 2.2% | |
| *at 3 months* | 20 | -0.25 | 0.327 | 6.4% | |
| *at 6 months* | 18 | -0.16 | 0.514 | 2.7% | |
| **%EBMIL**  **at 12 months** | *at 1 month* | 18 | -0.20 | 0.439 | 4.0% | |
| *at 3 months* | 20 | -0.22 | 0.382 | 4.8% | |
| *at 6 months* | 18 | -0.18 | 0.465 | 3.4% | |
| *at 12 months* | 19 | -0.04 | 0.863 | 0.2% | |
| Abbreviations: **r**, Pearson correlation coefficient; **r2**, Coefficient of determination; **%EBMIL**, Percentage Excess Body Mass Index Loss. | | | | | |  |

Supplementary Table : Results of Partial Correlation Analysis for Weight Loss and Decrease in Energy Intake from Sucrose Compared to Baseline Adjusted for Basal Metabolic Rate (BMR) in the study group undergoing Roux-en-Y Gastric Bypass (RYGB) surgery.

The table presents the results of the partial correlation analysis for weight loss throughout the follow-up and decrease in energy intake from sucrose compared to baseline adjusted for Basal Metabolic Rate (BMR) in the study group undergoing Roux-en-Y Gastric Bypass (RYGB) surgery. The partial correlations were calculated by fitting linear models to control for BMR, extracting the residuals, and computing the correlation of these residuals. For each time frame, the table reports the number of complete cases (N), the partial correlation coefficients (partial r), and p-values (Pr(>|t|)). The standard errors and residual standard errors were estimated using the ordinary least squares (OLS) method, which calculates the variability of the coefficient estimates and residuals by minimizing the sum of the squared differences between the observed and predicted values. The adjusted r-squared (r²) value, or coefficient of determination, represents the proportion of the variance in the dependent variable that is explained by the independent variables in the model.

| **Variable** | **Decreased**  **Sucrose**  **Intake** | **N** | **Partial *r*** | **Pr(>|t|)** | **Adjusted *r2*** | |
| --- | --- | --- | --- | --- | --- | --- |
| **%EBMIL**  **at 1 month** | *at 1 month* | 18 | 0.39 | 0.108 | 15.4% | |
| **%EBMIL**  **at 3 months** | *at 1 month* | 18 | 0.03 | 0.899 | 0.1% | |
| *at 3 months* | 20 | 0.26 | 0.264 | 6.9% | |
| **%EBMIL**  **at 6 months** | *at 1 month* | 18 | 0.03 | 0.899 | 0.1% | |
| *at 3 months* | 20 | 0.05 | 0.849 | 0.2% | |
| *at 6 months* | 18 | 0.03 | 0.897 | 0.1% | |
| **%EBMIL**  **at 12 months** | *at 1 month* | 18 | -0.05 | 0.859 | 0.2% | |
| *at 3 months* | 20 | 0.15 | 0.548 | 2.3% | |
| *at 6 months* | 18 | -0.06 | 0.828 | 0.3% | |
| *at 12 months* | 19 | 0.02 | 0.934 | 0.0% | |
| Abbreviations: **r**, Pearson correlation coefficient; **r2**, Coefficient of determination; **%EBMIL**, Percentage Excess Body Mass Index Loss. | | | | | |  |

# Linear Relationship between Weight Loss and Energy Intake from Fats

Supplementary Table : Results of Linear Correlation Analysis for Weight Loss and Energy Intake from Fats in the study group undergoing Roux-en-Y Gastric Bypass (RYGB) surgery.

The table presents the results of the linear correlation analysis for weight loss throughout the follow-up and energy intake from fats in the study group undergoing Roux-en-Y Gastric Bypass (RYGB) surgery. For each time frame, the table reports the number of complete cases (N), the Pearson correlation coefficients (r), p-values (Pr(>|t|)), and confidence intervals of the coefficient (lower and upper 95% CI). The r-squared (r²) value, or coefficient of determination, represents the proportion of the variance in the dependent variable that is explained by the independent variables in the model.

| **Variable** | **Fat**  **Intake** | **N** | **r** | **Pr(>|t|)** | **Lower**  **95% CI** | **Upper**  **95% CI** | **r2** | |
| --- | --- | --- | --- | --- | --- | --- | --- | --- |
| **%EBMIL**  **at 1 month** | *at Baseline* | 22 | -0.29 | 0.239 | -0.67 | 0.20 | 8.6% | |
| *at 1 month* | 18 | -0.11 | 0.662 | -0.55 | 0.38 | 1.2% | |
| **%EBMIL**  **at 3 months** | *at Baseline* | 22 | -0.20 | 0.392 | -0.59 | 0.26 | 4.1% | |
| *at 1 month* | 18 | 0.40 | 0.109 | -0.10 | 0.74 | 16.2% | |
| *at 3 months* | 20 | 0.03 | 0.905 | -0.42 | 0.47 | 0.1% | |
| **%EBMIL**  **at 6 months** | *at Baseline* | 22 | -0.27 | 0.284 | -0.65 | 0.23 | 7.1% | |
| *at 1 month* | 18 | 0.33 | 0.194 | -0.18 | 0.70 | 11.0% | |
| *at 3 months* | 20 | 0.02 | 0.934 | -0.46 | 0.50 | 0.0% | |
| *at 6 months* | 18 | 0.05 | 0.833 | -0.42 | 0.51 | 0.3% | |
| **%EBMIL**  **at 12 months** | *at Baseline* | 22 | -0.32 | 0.186 | -0.67 | 0.16 | 10.0% | |
| *at 1 month* | 18 | 0.31 | 0.227 | -0.20 | 0.69 | 9.5% | |
| *at 3 months* | 20 | 0.04 | 0.867 | -0.43 | 0.50 | 0.2% | |
| *at 6 months* | 18 | -0.06 | 0.804 | -0.51 | 0.42 | 0.4% | |
| *at 12 months* | 19 | -0.12 | 0.630 | -0.54 | 0.35 | 1.4% | |
| Abbreviations: **CI**, confidence interval; **r**, Pearson correlation coefficient; **R2**, Coefficient of determination; **%EBMIL**, Percentage Excess Body Mass Index Loss. | | | | | | | |  |

Supplementary Table : Results of Linear Correlation Analysis for Weight Loss and Decrease in Energy Intake from Fats compared to Baseline in the study group undergoing Roux-en-Y Gastric Bypass (RYGB) surgery.

The table presents the results of the linear correlation analysis for weight loss throughout the follow-up and decrease in energy intake from fats compared to baseline in the study group undergoing Roux-en-Y Gastric Bypass (RYGB) surgery. For each time frame, the table reports the number of complete cases (N), the Pearson correlation coefficients (r), p-values (Pr(>|t|)), and confidence intervals of the coefficient (lower and upper 95% CI). The r-squared (r²) value, or coefficient of determination, represents the proportion of the variance in the dependent variable that is explained by the independent variables in the model.

| **Variable** | **Decreased**  **Fat**  **Intake** | **N** | **r** | **Pr(>|t|)** | **Lower**  **95% CI** | **Upper**  **95% CI** | **r2** | |
| --- | --- | --- | --- | --- | --- | --- | --- | --- |
| **%EBMIL**  **at 1 month** | *at 1 month* | 19 | 0.21 | 0.412 | -0.29 | 0.61 | 4.2% | |
| **%EBMIL**  **at 3 months** | *at 1 month* | 18 | 0.32 | 0.205 | -0.19 | 0.70 | 10.5% | |
| *at 3 months* | 18 | 0.21 | 0.382 | -0.26 | 0.59 | 4.3% | |
| **%EBMIL**  **at 6 months** | *at 1 month* | 20 | 0.39 | 0.120 | -0.11 | 0.73 | 15.3% | |
| *at 3 months* | 18 | 0.22 | 0.385 | -0.29 | 0.64 | 5.1% | |
| *at 6 months* | 20 | 0.27 | 0.284 | -0.23 | 0.65 | 7.1% | |
| **%EBMIL**  **at 12 months** | *at 1 month* | 18 | 0.40 | 0.108 | -0.10 | 0.74 | 16.3% | |
| *at 3 months* | 18 | 0.32 | 0.197 | -0.17 | 0.68 | 10.2% | |
| *at 6 months* | 20 | 0.22 | 0.384 | -0.28 | 0.62 | 4.8% | |
| *at 12 months* | 18 | 0.21 | 0.398 | -0.27 | 0.60 | 4.2% | |
| Abbreviations: **CI**, confidence interval; **r**, Pearson correlation coefficient; **R2**, Coefficient of determination; **%EBMIL**, Percentage Excess Body Mass Index Loss. | | | | | | | |  |

Supplementary Table : Results of Partial Correlation Analysis for Weight Loss and Energy Intake from Fats Adjusted for Basal Metabolic Rate (BMR) in the study group undergoing Roux-en-Y Gastric Bypass (RYGB) surgery.

The table presents the results of the partial correlation analysis for weight loss throughout the follow-up and energy intake from fats adjusted for Basal Metabolic Rate (BMR) in the study group undergoing Roux-en-Y Gastric Bypass (RYGB) surgery. The partial correlations were calculated by fitting linear models to control for BMR, extracting the residuals, and computing the correlation of these residuals. For each time frame, the table reports the number of complete cases (N), the partial correlation coefficients (partial r), and p-values (Pr(>|t|)). The standard errors and residual standard errors were estimated using the ordinary least squares (OLS) method, which calculates the variability of the coefficient estimates and residuals by minimizing the sum of the squared differences between the observed and predicted values. The adjusted r-squared (r²) value, or coefficient of determination, represents the proportion of the variance in the dependent variable that is explained by the independent variables in the model.

| **Variable** | **Fat**  **Intake** | **N** | **Partial *r*** | **Pr(>|t|)** | **Adjusted *r2*** | |
| --- | --- | --- | --- | --- | --- | --- |
| **%EBMIL**  **at 1 month** | *at Baseline* | 22 | -0.38 | 0.119 | 14.5% | |
| *at 1 month* | 18 | -0.19 | 0.451 | 3.6% | |
| **%EBMIL**  **at 3 months** | *at Baseline* | 22 | -0.41 | 0.074 | 16.7% | |
| *at 1 month* | 18 | 0.36 | 0.157 | 12.9% | |
| *at 3 months* | 20 | 0.11 | 0.642 | 1.2% | |
| **%EBMIL**  **at 6 months** | *at Baseline* | 22 | -0.39 | 0.113 | 15.0% | |
| *at 1 month* | 18 | 0.31 | 0.229 | 9.5% | |
| *at 3 months* | 20 | 0.04 | 0.867 | 0.2% | |
| *at 6 months* | 18 | 0.10 | 0.708 | 0.9% | |
| **%EBMIL**  **at 12 months** | *at Baseline* | 22 | -0.39 | 0.103 | 14.9% | |
| *at 1 month* | 18 | 0.31 | 0.231 | 9.4% | |
| *at 3 months* | 20 | 0.08 | 0.764 | 0.6% | |
| *at 6 months* | 18 | -0.05 | 0.849 | 0.2% | |
| *at 12 months* | 19 | 0.10 | 0.687 | 1.0% | |
| Abbreviations: **r**, Pearson correlation coefficient; **r2**, Coefficient of determination; **%EBMIL**, Percentage Excess Body Mass Index Loss. | | | | | |  | |

Supplementary Table : Results of Partial Correlation Analysis for Weight Loss and Decrease in Energy Intake from Fats Compared to Baseline Adjusted for Basal Metabolic Rate (BMR) in the study group undergoing Roux-en-Y Gastric Bypass (RYGB) surgery.

The table presents the results of the partial correlation analysis for weight loss throughout the follow-up and decrease in energy intake from fats compared to baseline adjusted for Basal Metabolic Rate (BMR) in the study group undergoing Roux-en-Y Gastric Bypass (RYGB) surgery. The partial correlations were calculated by fitting linear models to control for BMR, extracting the residuals, and computing the correlation of these residuals. For each time frame, the table reports the number of complete cases (N), the partial correlation coefficients (partial r), and p-values (Pr(>|t|)). The standard errors and residual standard errors were estimated using the ordinary least squares (OLS) method, which calculates the variability of the coefficient estimates and residuals by minimizing the sum of the squared differences between the observed and predicted values. The adjusted r-squared (r²) value, or coefficient of determination, represents the proportion of the variance in the dependent variable that is explained by the independent variables in the model.

| **Variable** | **Decreased**  **Fat**  **Intake** | **N** | **Partial *r*** | **Pr(>|t|)** | **Adjusted *r2*** | |
| --- | --- | --- | --- | --- | --- | --- |
| **%EBMIL**  **at 1 month** | *at 1 month* | 18 | 0.29 | 0.237 | 8.6% | |
| **%EBMIL**  **at 3 months** | *at 1 month* | 18 | 0.46 | 0.061 | 21.4% | |
| *at 3 months* | 20 | 0.50 | 0.025 | 24.9% | |
| **%EBMIL**  **at 6 months** | *at 1 month* | 18 | 0.44 | 0.076 | 19.6% | |
| *at 3 months* | 20 | 0.38 | 0.129 | 14.6% | |
| *at 6 months* | 18 | 0.49 | 0.041 | 23.6% | |
| **%EBMIL**  **at 12 months** | *at 1 month* | 18 | 0.42 | 0.094 | 17.5% | |
| *at 3 months* | 20 | 0.44 | 0.069 | 19.2% | |
| *at 6 months* | 18 | 0.34 | 0.174 | 11.2% | |
| *at 12 months* | 19 | 0.48 | 0.039 | 22.8% | |
| Abbreviations: **r**, Pearson correlation coefficient; **r2**, Coefficient of determination; **%EBMIL**, Percentage Excess Body Mass Index Loss. | | | | | |  |

# Linear Relationship between Weight Loss and Energy Intake from Proteins

Supplementary Table : Results of Linear Correlation Analysis for Weight Loss and Energy Intake from Proteins in the study group undergoing Roux-en-Y Gastric Bypass (RYGB) surgery.

The table presents the results of the linear correlation analysis for weight loss throughout the follow-up and energy intake from proteins in the study group undergoing Roux-en-Y Gastric Bypass (RYGB) surgery. For each time frame, the table reports the number of complete cases (N), the Pearson correlation coefficients (r), p-values (Pr(>|t|)), and confidence intervals of the coefficient (lower and upper 95% CI). The r-squared (r²) value, or coefficient of determination, represents the proportion of the variance in the dependent variable that is explained by the independent variables in the model.

| **Variable** | **Protein**  **Intake** | **N** | **r** | **Pr(>|t|)** | **Lower**  **95% CI** | **Upper**  **95% CI** | **r2** | |
| --- | --- | --- | --- | --- | --- | --- | --- | --- |
| **%EBMIL**  **at 1 month** | *at Baseline* | 22 | -0.39 | 0.109 | -0.73 | 0.09 | 15.2% | |
| *at 1 month* | 18 | -0.16 | 0.524 | -0.58 | 0.33 | 2.6% | |
| **%EBMIL**  **at 3 months** | *at Baseline* | 22 | 0.15 | 0.535 | -0.32 | 0.55 | 2.2% | |
| *at 1 month* | 18 | 0.38 | 0.136 | -0.13 | 0.73 | 14.2% | |
| *at 3 months* | 20 | 0.15 | 0.521 | -0.31 | 0.56 | 2.3% | |
| **%EBMIL**  **at 6 months** | *at Baseline* | 22 | -0.03 | 0.902 | -0.49 | 0.44 | 0.1% | |
| *at 1 month* | 18 | 0.14 | 0.590 | -0.36 | 0.58 | 2.0% | |
| *at 3 months* | 20 | 0.04 | 0.870 | -0.45 | 0.51 | 0.2% | |
| *at 6 months* | 18 | -0.13 | 0.604 | -0.56 | 0.36 | 1.7% | |
| **%EBMIL**  **at 12 months** | *at Baseline* | 22 | 0.02 | 0.928 | -0.44 | 0.47 | 0.0% | |
| *at 1 month* | 18 | 0.20 | 0.433 | -0.31 | 0.62 | 4.1% | |
| *at 3 months* | 20 | 0.12 | 0.636 | -0.37 | 0.56 | 1.4% | |
| *at 6 months* | 18 | -0.08 | 0.747 | -0.53 | 0.40 | 0.7% | |
| *at 12 months* | 19 | 0.19 | 0.428 | -0.29 | 0.60 | 3.7% | |
| Abbreviations: **CI**, confidence interval; **r**, Pearson correlation coefficient; **R2**, Coefficient of determination; **%EBMIL**, Percentage Excess Body Mass Index Loss. | | | | | | | |  |

Supplementary Table : Results of Linear Correlation Analysis for Weight Loss and Decrease in Energy Intake from Proteins Compared to Baseline in the study group undergoing Roux-en-Y Gastric Bypass (RYGB) surgery.

The table presents the results of the linear correlation analysis for weight loss throughout the follow-up and decrease in energy intake from proteins compared to baseline in the study group undergoing Roux-en-Y Gastric Bypass (RYGB) surgery. For each time frame, the table reports the number of complete cases (N), the Pearson correlation coefficients (r), p-values (Pr(>|t|)), and confidence intervals of the coefficient (lower and upper 95% CI). The r-squared (r²) value, or coefficient of determination, represents the proportion of the variance in the dependent variable that is explained by the independent variables in the model.

| **Variable** | **Decreased**  **Protein**  **Intake** | **N** | **r** | **Pr(>|t|)** | **Lower**  **95% CI** | **Upper**  **95% CI** | **r2** | |
| --- | --- | --- | --- | --- | --- | --- | --- | --- |
| **%EBMIL**  **at 1 month** | *at 1 month* | 18 | 0.35 | 0.154 | -0.14 | 0.70 | 12.3% | |
| **%EBMIL**  **at 3 months** | *at 1 month* | 18 | 0.00 | 0.994 | -0.48 | 0.48 | 0.0% | |
| *at 3 months* | 20 | -0.08 | 0.724 | -0.51 | 0.37 | 0.7% | |
| **%EBMIL**  **at 6 months** | *at 1 month* | 18 | 0.10 | 0.695 | -0.40 | 0.56 | 1.1% | |
| *at 3 months* | 20 | -0.07 | 0.784 | -0.53 | 0.42 | 0.5% | |
| *at 6 months* | 18 | -0.01 | 0.956 | -0.48 | 0.46 | 0.0% | |
| **%EBMIL**  **at 12 months** | *at 1 month* | 18 | 0.06 | 0.811 | -0.43 | 0.53 | 0.4% | |
| *at 3 months* | 20 | -0.01 | 0.965 | -0.48 | 0.46 | 0.0% | |
| *at 6 months* | 18 | -0.05 | 0.846 | -0.50 | 0.43 | 0.2% | |
| *at 12 months* | 19 | 0.07 | 0.763 | -0.39 | 0.51 | 0.6% | |
| Abbreviations: **CI**, confidence interval; **r**, Pearson correlation coefficient; **R2**, Coefficient of determination; **%EBMIL**, Percentage Excess Body Mass Index Loss. | | | | | | | |  |

Supplementary Table : Results of Partial Correlation Analysis for Weight Loss and Energy Intake from Proteins Adjusted for Basal Metabolic Rate (BMR) in the study group undergoing Roux-en-Y Gastric Bypass (RYGB) surgery.

The table presents the results of the partial correlation analysis for weight loss throughout the follow-up and energy intake from proteins adjusted for Basal Metabolic Rate (BMR) in the study group undergoing Roux-en-Y Gastric Bypass (RYGB) surgery. The partial correlations were calculated by fitting linear models to control for BMR, extracting the residuals, and computing the correlation of these residuals. For each time frame, the table reports the number of complete cases (N), the partial correlation coefficients (partial r), and p-values (Pr(>|t|)). The standard errors and residual standard errors were estimated using the ordinary least squares (OLS) method, which calculates the variability of the coefficient estimates and residuals by minimizing the sum of the squared differences between the observed and predicted values. The adjusted r-squared (r²) value, or coefficient of determination, represents the proportion of the variance in the dependent variable that is explained by the independent variables in the model.

| **Variable** | **Protein**  **Intake** | **N** | **Partial *r*** | **Pr(>|t|)** | **Adjusted *r2*** | |
| --- | --- | --- | --- | --- | --- | --- |
| **%EBMIL**  **at 1 month** | *at Baseline* | 22 | -0.45 | 0.060 | 20.4% | |
| *at 1 month* | 18 | -0.24 | 0.341 | 5.7% | |
| **%EBMIL**  **at 3 months** | *at Baseline* | 22 | -0.04 | 0.875 | 0.1% | |
| *at 1 month* | 18 | 0.34 | 0.176 | 11.8% | |
| *at 3 months* | 20 | 0.20 | 0.391 | 4.1% | |
| **%EBMIL**  **at 6 months** | *at Baseline* | 22 | -0.09 | 0.708 | 0.9% | |
| *at 1 month* | 18 | 0.12 | 0.657 | 1.3% | |
| *at 3 months* | 20 | 0.01 | 0.965 | 0.0% | |
| *at 6 months* | 18 | 0.05 | 0.830 | 0.3% | |
| **%EBMIL**  **at 12 months** | *at Baseline* | 22 | -0.02 | 0.928 | 0.0% | |
| *at 1 month* | 18 | 0.20 | 0.441 | 4.0% | |
| *at 3 months* | 20 | 0.13 | 0.601 | 1.7% | |
| *at 6 months* | 18 | 0.04 | 0.883 | 0.1% | |
| *at 12 months* | 19 | 0.36 | 0.129 | 13.0% | |
| Abbreviations: **r**, Pearson correlation coefficient; **r2**, Coefficient of determination; **%EBMIL**, Percentage Excess Body Mass Index Loss. | | | | | |  | |

Supplementary Table : Results of Partial Correlation Analysis for Weight Loss and Decrease in Energy Intake from Proteins Compared to Baseline Adjusted for Basal Metabolic Rate (BMR) in the study group undergoing Roux-en-Y Gastric Bypass (RYGB) surgery.

The table presents the results of the partial correlation analysis for weight loss throughout the follow-up and decrease in energy intake from proteins compared to baseline adjusted for Basal Metabolic Rate (BMR) in the study group undergoing Roux-en-Y Gastric Bypass (RYGB) surgery. The partial correlations were calculated by fitting linear models to control for BMR, extracting the residuals, and computing the correlation of these residuals. For each time frame, the table reports the number of complete cases (N), the partial correlation coefficients (partial r), and p-values (Pr(>|t|)). The standard errors and residual standard errors were estimated using the ordinary least squares (OLS) method, which calculates the variability of the coefficient estimates and residuals by minimizing the sum of the squared differences between the observed and predicted values. The adjusted r-squared (r²) value, or coefficient of determination, represents the proportion of the variance in the dependent variable that is explained by the independent variables in the model.

| **Variable** | **Decreased**  **Fat**  **Intake** | **N** | **Partial *r*** | **Pr(>|t|)** | **Adjusted *r2*** | |
| --- | --- | --- | --- | --- | --- | --- |
| **%EBMIL**  **at 1 month** | *at 1 month* | 18 | 0.40 | 0.096 | 16.3% | |
| **%EBMIL**  **at 3 months** | *at 1 month* | 18 | 0.11 | 0.672 | 1.2% | |
| *at 3 months* | 20 | 0.17 | 0.486 | 2.7% | |
| **%EBMIL**  **at 6 months** | *at 1 month* | 18 | 0.12 | 0.655 | 1.4% | |
| *at 3 months* | 20 | 0.02 | 0.942 | 0.0% | |
| *at 6 months* | 18 | 0.12 | 0.626 | 1.5% | |
| **%EBMIL**  **at 12 months** | *at 1 month* | 18 | 0.07 | 0.803 | 0.4% | |
| *at 3 months* | 20 | 0.09 | 0.723 | 0.8% | |
| *at 6 months* | 18 | 0.03 | 0.908 | 0.1% | |
| *at 12 months* | 19 | 0.23 | 0.341 | 5.3% | |
| Abbreviations: **r**, Pearson correlation coefficient; **r2**, Coefficient of determination; **%EBMIL**, Percentage Excess Body Mass Index Loss. | | | | | |  |

# Stimulus Consumption

Supplementary Table : Summary Statistics of the Energy Intake from Each of the Four Stimuli for the Study Groups Throughout the Study Period.

|  | **Cohort** | | |
| --- | --- | --- | --- |
|  | **RYGB***  N = 23 | **Obesity***  N = 24 | **Normal-Weight***  N = 11 |
| **HF-HS (kcal)** |  |  |  |
| *Baseline* | 25.9 ± 72.5 | 71.5 ± 198.2 | 68.8 ± 172.7 |
| *1 month* | 5.4 ± 13.5 | - | - |
| *3 months* | 10.0 ± 28.4 | 157.2 ± 283.4 | 39.1 ± 69.7 |
| *6 months* | 2.1 ± 8.1 | 61.6 ± 151.6 | 114.7 ± 219.0 |
| *12 months* | 18.4 ± 29.5 | - | 39.6 ± 67.7 |
| **HF-LS (kcal)** |  |  |  |
| *Baseline* | 46.6 ± 105.7 | 48.4 ± 130.4 | 78.7 ± 134.8 |
| *1 month* | 19.3 ± 24.4 | - | - |
| *3 months* | 13.1 ± 25.6 | 49.3 ± 139.3 | 84.6 ± 147.8 |
| *6 months* | 30.9 ± 42.7 | 87.2 ± 125.0 | 94.4 ± 129.8 |
| *12 months* | 37.2 ± 52.7 | - | 120.3 ± 143.5 |
| **LF-HS (kcal)** |  |  |  |
| *Baseline* | 39.8 ± 79.0 | 13.4 ± 34.5 | 4.1 ± 9.2 |
| *1 month* | 13.7 ± 32.0 | - | - |
| *3 months* | 1.6 ± 4.8 | 52.2 ± 160.5 | 76.8 ± 111.7 |
| *6 months* | 11.5 ± 22.1 | 75.5 ± 161.1 | 32.5 ± 58.0 |
| *12 months* | 20.1 ± 47.8 | - | 51.7 ± 86.9 |
| **LF-LS (kcal)** |  |  |  |
| *Baseline* | 36.4 ± 77.6 | 68.4 ± 143.9 | 26.6 ± 35.2 |
| *1 month* | 7.3 ± 11.5 | - | - |
| *3 months* | 8.3 ± 11.3 | 66.6 ± 128.7 | 24.5 ± 33.0 |
| *6 months* | 5.0 ± 9.2 | 74.1 ± 179.9 | 25.0 ± 37.5 |
| *12 months* | 11.0 ± 19.3 | - | 33.5 ± 56.2 |
| Abbreviations: **HF-HS**, high-fat/high-sucrose; **HF-LS**, high-fat/low-sucrose; **LF-HS**, low-fat/high-sucrose; **LF-LS**, low-fat/low-sucrose; **RYGB**, Roux-en-Y Gastric Bypass.  *** Mean ± SD. SD, standard deviation. | | | |

Supplementary Table : Significant Pairwise Comparisons of Energy Intake from Each of the Four Stimuli Between Baseline and Follow-up Time Points Between Cohorts.

The table presents the statistically significant estimated differences in energy intake (kcal) from each of the four stimuli between the three study groups (Obesity, Normal Weight, and RYGB) at each time point (baseline, 1 month, 3 months, 6 months, and 12 months). The estimates are derived from a linear mixed model (LMM) with pairwise comparisons performed using estimated marginal means (EMM). The LMM was built with an interaction term between cohort and time point. Significant differences are reported with their corresponding standard errors (SE), degrees of freedom (DF), confidence intervals (lower 95% CI, upper 95% CI), t-ratios, and p-values. The standard errors were estimated using the ordinary least squares (OLS) method, which calculates the variability of the coefficient estimates and residuals by minimizing the sum of the squared differences between the observed and predicted values.

|  | Estimate | SE | DF | Lower  95% CI | Upper  95% CI | t-ratio | p-value |
| --- | --- | --- | --- | --- | --- | --- | --- |
| RYGB Baseline  vs  Obesity Baseline | -284.07 | 78.38 | 175.54 | -553.73 | -14.42 | -3.624 | **0.028** |
| RYGB 1 month  vs  Obesity 1 month | -315.46 | 78.38 | 175.54 | -585.12 | -45.81 | -4.025 | **0.007** |
| Abbreviations: **CI**, confidence interval; **DF**, degrees of freedom; **RYGB**, Roux-en-Y Gastric Bypass; **SE**, standard error. | | | | | | | |

Supplementary Table : Contingengy Table of the Frequency of Each Stimulus being the Most Consumed at Any Time Points for The Study Group with RYGB.

Contingengy table of the frequency of each of the four stimuli being the most consumed at any time points for the study group with RYGB. The results of a Chi-square test enhanced with a Monte Carlo simulation, specifying 2000 simulations to estimate the p-value, are reported in the legend of the table.

|  | **RYGB** | | | |
| --- | --- | --- | --- | --- |
|  | **HF-HS** | **HF-LS** | **LF-HS** | **LF-LS** |
| Baseline | 3 | 7 | 6 | 7 |
| 1 month | 3 | 8 | 4 | 4 |
| 3 months | 4 | 9 | 3 | 5 |
| 6 months | 1 | 12 | 5 | 1 |
| 12 months | 6 | 6 | 4 | 4 |
| Χ2 = 11.70, p-value = 0.468  Abbreviations: **HF-HS**, high-fat/high-sucrose; **HF-LS**, high-fat/low-sucrose; **LF-HS**, low-fat/high-sucrose; **LF-LS**, low-fat/low-sucrose; **RYGB**, Roux-en-Y Gastric Bypass. | | | | |

Supplementary Table : Contingengy Table of the Frequency of Each Stimulus being the Most Consumed at Any Time Points for The Study Group with Obesity.

Contingengy table of the frequency of each of the four stimuli being the most consumed at any time points for the study group with obesity. The results of a Chi-square test enhanced with a Monte Carlo simulation, specifying 2000 simulations to estimate the p-value, are reported in the legend of the table.

|  | **Obesity** | | | |
| --- | --- | --- | --- | --- |
|  | **HF-HS** | **HF-LS** | **LF-HS** | **LF-LS** |
| Baseline | 10 | 5 | 1 | 8 |
| 1 month | - | - | - | - |
| 3 months | 8 | 8 | 4 | 2 |
| 6 months | 4 | 9 | 4 | 4 |
| 12 months | - | - | - | - |
| Χ2 = 16.25, p-value = 0.175  Abbreviations: **HF-HS**, high-fat/high-sucrose; **HF-LS**, high-fat/low-sucrose; **LF-HS**, low-fat/high-sucrose; **LF-LS**, low-fat/low-sucrose. | | | | |

Supplementary Table : Contingengy Table of the Frequency of Each Stimulus being the Most Consumed at Any Time Points for The Study Group with Normal Weight.

Contingengy table of the frequency of each of the four stimuli being the most consumed at any time points for the study group with normal weight. The results of a Chi-square test enhanced with a Monte Carlo simulation, specifying 2000 simulations to estimate the p-value, are reported in the legend of the table.

|  | **Normal Weight** | | | |
| --- | --- | --- | --- | --- |
|  | **HF-HS** | **HF-LS** | **LF-HS** | **LF-LS** |
| Baseline | 4 | 5 | 0 | 2 |
| 1 month | - | - | - | - |
| 3 months | 2 | 5 | 3 | 1 |
| 6 months | 4 | 3 | 2 | 2 |
| 12 months | 3 | 4 | 2 | 1 |
| Χ2 = 7.40, p-value = 0.883  Abbreviations: **HF-HS**, high-fat/high-sucrose; **HF-LS**, high-fat/low-sucrose; **LF-HS**, low-fat/high-sucrose; **LF-LS**, low-fat/low-sucrose. | | | | |

Supplementary Table : Contingengy Table of the Frequency of Each Stimulus being the Most Liked at Any Time Points for The Study Group with RYGB.

Contingengy table of the frequency of each of the four stimuli being the most liked at any time points for the study group with RYGB. The results of a Chi-square test enhanced with a Monte Carlo simulation, specifying 2000 simulations to estimate the p-value, are reported in the legend of the table.

|  | **RYGB** | | | |
| --- | --- | --- | --- | --- |
|  | **HF-HS** | **HF-LS** | **LF-HS** | **LF-LS** |
| Baseline | 0 | 5 | 2 | 3 |
| 1 month | 1 | 3 | 2 | 2 |
| 3 months | 2 | 5 | 0 | 3 |
| 6 months | 1 | 6 | 0 | 2 |
| 12 months | 4 | 3 | 2 | 3 |
| Χ2 = 10.53, p-value = 0.628  Abbreviations: **HF-HS**, high-fat/high-sucrose; **HF-LS**, high-fat/low-sucrose; **LF-HS**, low-fat/high-sucrose; **LF-LS**, low-fat/low-sucrose; **RYGB**, Roux-en-Y Gastric Bypass. | | | | |

Supplementary Table : Contingency Table of the Frequency of Each Stimulus being the Most Liked at Any Time Points for The Study Group with Obesity.

Contingency table of the frequency of each of the four stimuli being the most liked at any time points for the study group with obesity. The results of a Chi-square test enhanced with a Monte Carlo simulation, specifying 2000 simulations to estimate the p-value, are reported in the legend of the table.

|  | **Obesity** | | | |
| --- | --- | --- | --- | --- |
|  | **HF-HS** | **HF-LS** | **LF-HS** | **LF-LS** |
| Baseline | 10 | 6 | 1 | 6 |
| 1 month | - | - | - | - |
| 3 months | 6 | 8 | 5 | 2 |
| 6 months | 4 | 9 | 3 | 4 |
| 12 months | - | - | - | - |
| Χ2 = 12.86, p-value = 0.393  Abbreviations: **HF-HS**, high-fat/high-sucrose; **HF-LS**, high-fat/low-sucrose; **LF-HS**, low-fat/high-sucrose; **LF-LS**, low-fat/low-sucrose. | | | | |

Supplementary Table : Contingency Table of the Frequency of Each Stimulus being the Most Liked at Any Time Points for The Study Group with Normal Weight.

Contingency table of the frequency of each of the four stimuli being the most liked at any time points for the study group with normal weight. The results of a Chi-square test enhanced with a Monte Carlo simulation, specifying 2000 simulations to estimate the p-value, are reported in the legend of the table.

|  | **Normal Weight** | | | |
| --- | --- | --- | --- | --- |
|  | **HF-HS** | **HF-LS** | **LF-HS** | **LF-LS** |
| Baseline | 4 | 5 | 0 | 2 |
| 1 month | - | - | - | - |
| 3 months | 2 | 5 | 2 | 2 |
| 6 months | 4 | 3 | 2 | 2 |
| 12 months | 2 | 5 | 3 | 0 |
| Χ2 = 6.76, p-value = 0.683  Abbreviations: **HF-HS**, high-fat/high-sucrose; **HF-LS**, high-fat/low-sucrose; **LF-HS**, low-fat/high-sucrose; **LF-LS**, low-fat/low-sucrose. | | | | |

# Exploratory Behaviour

Supplementary Table : Summary Statistics of the Number of Stimuli Drank From for the Study Groups Throughout the Study Period.

|  | **Cohort** | | |
| --- | --- | --- | --- |
|  | **RYGB***  n = 23 | **Obesity***  n = 24 | **Normal-Weight***  n = 11 |
| **Baseline** | 1.4 ± 0.6 | 1.5 ± 0.7 | 1.9 ± 0.5 |
| **1 month** | 1.3 ± 0.6 | - | - |
| **3 months** | 1.2 ± 0.4 | 1.5 ± 0.7 | 2.1 ± 0.8 |
| **6 months** | 1.2 ± 0.4 | 1.3 ± 0.6 | 2.1 ± 1.2 |
| **12 months** | 1.4 ± 0.5 | - | 2.2 ± 1.2 |
| Abbreviations: **RYGB**, Roux-en-Y Gastric Bypass.  *** Mean ± SD. SD, standard deviation. | | | |

Supplementary Table : Summary Statistics of the Number of Switches Between Stimuli Drank From for the Study Groups Throughout the Study Period.

|  | **Cohort** | | |
| --- | --- | --- | --- |
|  | **RYGB***  n = 23 | **Obesity***  n = 24 | **Normal-Weight***  n = 11 |
| **Baseline** | 2.1 ± 1.5 | 1.9 ± 1.1 | 3.7 ± 1.6 |
| **1 month** | 1.3 ± 0.9 | - | - |
| **3 months** | 1.4 ± 0.8 | 1.6 ± 1.0 | 4.0 ± 1.7 |
| **6 months** | 1.3 ± 1.0 | 2.0 ± 1.3 | 3.0 ± 1.9 |
| **12 months** | 1.5 ± 1.0 | - | 3.9 ± 2.0 |
| Abbreviations: **RYGB**, Roux-en-Y Gastric Bypass.  *** Mean ± SD. SD, standard deviation. | | | |

Supplementary Table : Significant Pairwise Comparisons of Number of Stimuli Drank From Between Baseline and Follow-up Time Points Between Cohorts.

The table presents the statistically significant estimated differences in number of stimuli drank from between the three study groups (Obesity, Normal Weight, and RYGB) at each time point (baseline, 1 month, 3 months, 6 months, and 12 months). The estimates are derived from a linear mixed model (LMM) with pairwise comparisons performed using estimated marginal means (EMM). The LMM was built with an interaction term between cohort and time point. Significant differences are reported with their corresponding standard errors (SE), degrees of freedom (DF), confidence intervals (lower 95% CI, upper 95% CI), t-ratios, and p-values. The standard errors were estimated using the ordinary least squares (OLS) method, which calculates the variability of the coefficient estimates and residuals by minimizing the sum of the squared differences between the observed and predicted values.

|  | Estimate | SE | DF | Lower  95% CI | Upper  95% CI | t-ratio | p-value |
| --- | --- | --- | --- | --- | --- | --- | --- |
| RYGB Baseline  vs  Normal-Weight Baseline | –0.75 | 0.17 | 53.21 | –1.34 | –0.16 | –4.532 | **0.003** |
| Obesity Baseline  vs  Normal-Weight Baseline | –0.61 | 0.16 | 52.59 | –1.19 | –0.02 | –3.706 | **0.033** |
| RYGB 1 month  vs  Normal-Weight 1 month | –0.75 | 0.17 | 53.21 | –1.34 | –0.16 | –4.532 | **0.003** |
| Obesity 1 month  vs  Normal-Weight 1 month | –0.61 | 0.16 | 52.59 | –1.19 | –0.02 | –3.706 | **0.033** |
| RYGB 3 months  vs  Normal-Weight 3 months | –0.75 | 0.17 | 53.21 | –1.34 | –0.16 | –4.532 | **0.003** |
| Obesity 3 months  vs  Normal-Weight 3 months | –0.61 | 0.16 | 52.59 | –1.19 | –0.02 | –3.706 | **0.033** |
| RYGB 6 months  vs  Normal-Weight 6 months | –0.75 | 0.17 | 53.21 | –1.34 | –0.16 | –4.532 | **0.003** |
| Obesity 6 months  vs  Normal-Weight 6 months | –0.61 | 0.16 | 52.59 | –1.19 | –0.02 | –3.706 | **0.033** |
| RYGB 12 months  vs  Normal-Weight 12 months | –0.75 | 0.17 | 53.21 | –1.34 | –0.16 | –4.532 | **0.003** |
| Obesity 12 months  vs  Normal-Weight 12 months | –0.61 | 0.16 | 52.59 | –1.19 | –0.02 | –3.706 | **0.033** |
| Abbreviations: **CI**, confidence interval; **DF**, degrees of freedom; **RYGB**, Roux-en-Y Gastric Bypass; **SE**, standard error. | | | | | | | |

Supplementary Table : Significant Pairwise Comparisons of Number of Switches Between Stimuli Drank From Between Baseline and Follow-up Time Points Between Cohorts.

The table presents the statistically significant estimated differences in number of switches between stimuli drank from between the three study groups (Obesity, Normal Weight, and RYGB) at each time point (baseline, 1 month, 3 months, 6 months, and 12 months). The estimates are derived from a linear mixed model (LMM) with pairwise comparisons performed using estimated marginal means (EMM). The LMM was built with an interaction term between cohort and time point. Significant differences are reported with their corresponding standard errors (SE), degrees of freedom (DF), confidence intervals (lower 95% CI, upper 95% CI), t-ratios, and p-values. The standard errors were estimated using the ordinary least squares (OLS) method, which calculates the variability of the coefficient estimates and residuals by minimizing the sum of the squared differences between the observed and predicted values.

|  | Estimate | SE | DF | Lower  95% CI | Upper  95% CI | t-ratio | p-value |
| --- | --- | --- | --- | --- | --- | --- | --- |
| Obesity Baseline  vs  Normal-Weight Baseline | –1.90 | 0.50 | 128.70 | –3.50 | –0.20 | –3.995 | **0.009** |
| RYGB 1 month  vs  Normal-Weight 1 month | –2.50 | 0.50 | 130.10 | –4.10 | –0.90 | –5.305 | **<0.001** |
| Obesity 1 month  vs  Normal-Weight 1 month | –1.90 | 0.50 | 130.10 | –3.50 | –0.20 | –3.979 | **0.009** |
| RYGB 3 months  vs  Normal-Weight 3 months | –2.70 | 0.50 | 130.10 | –4.30 | –1.00 | –5.694 | **<0.001** |
| Obesity 3 months  vs  Normal-Weight 3 months | –2.40 | 0.50 | 130.10 | –4.00 | –0.70 | –5.048 | **<0.001** |
| RYGB 6 months  vs  Normal-Weight 6 months | –1.80 | 0.50 | 130.10 | –3.40 | –0.10 | –3.750 | **0.020** |
| RYGB 12 months  vs  Normal-Weight 12 months | –2.40 | 0.50 | 137.20 | –4.00 | –0.70 | –4.943 | **<0.001** |
| Obesity 12 months  vs  Normal-Weight 12 months | –1.90 | 0.50 | 138.90 | –3.60 | –0.20 | –3.974 | **0.009** |
| Abbreviations: **CI**, confidence interval; **DF**, degrees of freedom; **RYGB**, Roux-en-Y Gastric Bypass; **SE**, standard error. | | | | | | | |

Supplementary Table : Mean Percentage of the Energy Intake from Each of the Four Stimuli for the Study Groups Throughout the Study Period.

|  | **Cohort** | | |
| --- | --- | --- | --- |
|  | **RYGB***  N = 23 | **Obesity***  N = 24 | **Normal-Weight***  N = 11 |
| **HF-HS (%kcal)** |  |  |  |
| *Baseline* | 11.7 % | 49.2 % | 32.6 % |
| *1 month* | 13.9 % | - | - |
| *3 months* | 25.6 % | 37.9 % | 15.8 % |
| *6 months* | 2.8 % | 15.0 % | 32.8 % |
| *12 months* | 21.6 % | - | 24.5 % |
| **HF-LS (%kcal)** |  |  |  |
| *Baseline* | 27.7 % | 17.2 % | 43.8 % |
| *1 month* | 52.3 % | - | - |
| *3 months* | 37.7 % | 26.2 % | 41.8 % |
| *6 months* | 71.4 % | 44.8 % | 42.9 % |
| *12 months* | 37.1 % | - | 49.0 % |
| **LF-HS (%kcal)** |  |  |  |
| *Baseline* | 30.8 % | 7.8 % | 5.5 % |
| *1 month* | 17.7 % | - | - |
| *3 months* | 14.0 % | 15.3 % | 25.0 % |
| *6 months* | 17.8 % | 17.9 % | 13.2 % |
| *12 months* | 20.0 % | - | 14.2 % |
| **LF-LS (%kcal)** |  |  |  |
| *Baseline* | 29.8 % | 25.9 % | 18.1 % |
| *1 month* | 16.0 % | - | - |
| *3 months* | 2.7 % | 20.6 % | 17.4 % |
| *6 months* | 8.0 % | 22.3 % | 11.2 % |
| *12 months* | 21.3 % | - | 12.3 % |
| Abbreviations: **HF-HS**, high-fat/high-sucrose; **HF-LS**, high-fat/low-sucrose; **LF-HS**, low-fat/high-sucrose; **LF-LS**, low-fat/low-sucrose; **RYGB**, Roux-en-Y Gastric Bypass.  *** Mean Percentage. | | | |

# Stimulus Liking

Supplementary Table : Summary Statistics of the Energy Intake from Each of the Four Stimuli for the Study Groups Throughout the Study Period.

|  | **Cohort** | | |
| --- | --- | --- | --- |
|  | **RYGB***  N = 23 | **Obesity***  N = 24 | **Normal-Weight***  N = 11 |
| **HF-HS (kcal)** |  |  |  |
| *Baseline* | 23.5 ± 24.6 | 54.1 ± 31.5 | 34.0 ± 34.7 |
| *1 month* | 27.0 ± 17.8 | - | - |
| *3 months* | 33.6 ± 33.3 | 47.3 ± 38.4 | 37.8 ± 31.5 |
| *6 months* | 24.1 ± 23.5 | 38.1 ± 25.9 | 31.2 ± 34.5 |
| *12 months* | 36.8 ± 36.4 | - | 41.9 ± 25.9 |
| **HF-LS (kcal)** |  |  |  |
| *Baseline* | 54.2 ± 23.5 | 51.5 ± 29.8 | 57.6 ± 35.5 |
| *1 month* | 51.9 ± 32.6 | - | - |
| *3 months* | 55.7 ± 37.1 | 56.7 ± 34.0 | 58.6 ± 35.5 |
| *6 months* | 52.3 ± 34.9 | 58.9 ± 38.5 | 62.4 ± 29.3 |
| *12 months* | 55.6 ± 37.3 | - | 60.3 ± 28.8 |
| **LF-HS (kcal)** |  |  |  |
| *Baseline* | 32.8 ± 36.9 | 35.5 ± 29.5 | 27.5 ± 27.5 |
| *1 month* | 43.5 ± 19.4 | - | - |
| *3 months* | 15.0 ± 21.1 | 43.6 ± 33.6 | 51.5 ± 34.8 |
| *6 months* | 25.1 ± 29.2 | 38.5 ± 27.7 | 41.1 ± 31.2 |
| *12 months* | 31.9 ± 34.0 | - | 37.7 ± 35.9 |
| **LF-LS (kcal)** |  |  |  |
| *Baseline* | 46.9 ± 38.2 | 53.0 ± 29.6 | 34.0 ± 34.7 |
| *1 month* | 53.1 ± 24.0 | - | - |
| *3 months* | 49.8 ± 29.3 | 50.0 ± 31.3 | 37.8 ± 31.5 |
| *6 months* | 27.7 ± 28.1 | 48.5 ± 36.6 | 31.2 ± 34.5 |
| *12 months* | 47.0 ± 31.9 | - | 41.9 ± 25.9 |
| Abbreviations: **HF-HS**, high-fat/high-sucrose; **HF-LS**, high-fat/low-sucrose; **LF-HS**, low-fat/high-sucrose; **LF-LS**, low-fat/low-sucrose; **RYGB**, Roux-en-Y Gastric Bypass.  *** Mean ± SD. SD, standard deviation. | | | |

# Relationship Liking and Amount Consumed

Supplementary Table : Results of Partial Correlation Analysis for Energy Intake from the Most-Liked Stimulus and its Reported Liking Adjusted for Basal Metabolic Rate (BMR) in the Three Study Groups.

The table presents the results of the partial correlation analysis for energy intake from the most-liked stimulus and its reported liking adjusted for Basal Metabolic Rate (BMR) in the three study groups (Obesity, Normal Weight, and RYGB). The partial correlations were calculated by fitting linear models to control for BMR, extracting the residuals, and computing the correlation of these residuals. For each time frame, the table reports the number of complete cases (N), the partial correlation coefficients (partial r), and p-values (Pr(>|t|)). The standard errors and residual standard errors were estimated using the ordinary least squares (OLS) method, which calculates the variability of the coefficient estimates and residuals by minimizing the sum of the squared differences between the observed and predicted values. The adjusted r-squared (r²) value, or coefficient of determination, represents the proportion of the variance in the dependent variable that is explained by the independent variables in the model.

| **Group** | **Energy**  **Intake** | **N** | **Partial *r*** | **Pr(>|t|)** | **Adjusted *r2*** | |
| --- | --- | --- | --- | --- | --- | --- |
| **RYGB** | *at Baseline* | 10 | 0.49 | 0.176 | 24.4% | |
| *at 1 month* | 8 | 0.18 | 0.706 | 3.1% | |
| *at 3 months* | 10 | -0.35 | 0.325 | 12.1% | |
| *at 6 months* | 9 | -0.11 | 0.794 | 1.2% | |
| *at 12 months* | 10 | 0.05 | 0.893 | 0.3% | |
| **Obesity** | *at Baseline* | 24 | 0.26 | 0.249 | 6.6% | |
| *at 3 months* | 22 | 0.49 | **0.029** | 23.9% | |
| *at 6 months* | 21 | 0.49 | **0.028** | 24.2% | |
| **Normal Weight** | *at Baseline* | 11 | 0.47 | 0.141 | 22.5% | |
| *at 3 months* | 11 | -0.06 | 0.902 | 0.3% | |
| *at 6 months* | 11 | -0.17 | 0.630 | 3.0% | |
| *at 12 months* | 10 | -0.01 | 0.984 | 0.0% | |
| Abbreviations: **HF-HS**, high-fat/high-sucrose; **HF-LS**, high-fat/low-sucrose; **LF-HS**, low-fat/high-sucrose; **LF-LS**, low-fat/low-sucrose; **r**, Pearson correlation coefficient; **r2**, Coefficient of determination; **RYGB**, Roux-en-Y gastric bypass. | | | | | |  | |

Supplementary Table : Results of Kendall’s Tau for Energy Intake from the Four Stimuli and Their Reported Liking in the Study Group Undergoing Roux-en-Y Gastric Bypass (RYGB) Surgery.

The table presents the results of the Kendall’s tau for energy intake from each of the four stimuli and their reported liking in the study group undergoing Roux-en-Y gastric bypass (RYGB) surgery. For each time frame, the table reports the number of complete cases (N), the Kendall’s tau (τ), and p-values (Pr(>|t|)). Missing values (reported with “-“) mean that, for the relative time point, there was no energy intake for the relative stimulus by any of the individuals of the study group.

| **Group** | **Energy**  **Intake** | **N** | **Kendall’s τ** | **Pr(>|t|)** | |
| --- | --- | --- | --- | --- | --- |
| **HF-HS** | *at Baseline* | 10 | 0.79 | **0.006** | |
| *at 1 month* | 8 | 0.02 | 0.957 | |
| *at 3 months* | 10 | 0.28 | 0.437 | |
| *at 6 months* | 9 | 0.45 | 0.229 | |
| *at 12 months* | 10 | 0.61 | 0.063 | |
| **HF-LS** | *at Baseline* | 10 | 0.67 | **0.034** | |
| *at 1 month* | 8 | 0.71 | **0.048** | |
| *at 3 months* | 10 | 0.84 | **0.002** | |
| *at 6 months* | 9 | 0.5 | 0.171 | |
| *at 12 months* | 10 | 0.26 | 0.477 | |
| **LF-HS** | *at Baseline* | 10 | 0.92 | **<0.001** | |
| *at 1 month* | 8 | 0.32 | 0.433 | |
| *at 3 months* | 10 | - | - | |
| *at 6 months* | 9 | - | - | |
| *at 12 months* | 10 | 0.71 | **0.022** | |
| **LF-LS** | *at Baseline* | 10 | 0.78 | **0.008** | |
| *at 1 month* | 8 | 0.71 | **0.049** | |
| *at 3 months* | 10 | 0.28 | 0.425 | |
| *at 6 months* | 9 | 0.56 | 0.116 | |
| *at 12 months* | 10 | 0.72 | **0.018** | |
| Abbreviations: **r**, Pearson correlation coefficient; **r2**, Coefficient of determination; **RYGB**, Roux-en-Y gastric bypass. | | | | |  | |

Supplementary Table : Results of Kendall’s Tau for Energy Intake from the Four Stimuli and Their Reported Liking in the Study Group with Obesity.

The table presents the results of the Kendall’s tau for energy intake from each of the four stimuli and their reported liking in the study group with obesity. For each time frame, the table reports the number of complete cases (N), the Kendall’s tau (τ), and p-values (Pr(>|t|)). Missing values (reported with “-“) mean that, for the relative time point, there was no energy intake for the relative stimulus by any of the individuals of the study group.

| **Group** | **Energy**  **Intake** | **N** | **Kendall’s τ** | **Pr(>|t|)** | |
| --- | --- | --- | --- | --- | --- |
| **HF-HS** | *at Baseline* | 24 | 0.72 | **<0.001** | |
| *at 3 months* | 22 | 0.71 | **<0.001** | |
| *at 6 months* | 21 | 0.69 | **0.001** | |
| **HF-LS** | *at Baseline* | 24 | 0.62 | **0.002** | |
| *at 3 months* | 22 | 0.68 | **0.001** | |
| *at 6 months* | 21 | 0.68 | **0.001** | |
| **LF-HS** | *at Baseline* | 24 | 0.47 | **0.024** | |
| *at 3 months* | 22 | 0.60 | **0.004** | |
| *at 6 months* | 21 | 0.64 | **0.002** | |
| **LF-LS** | *at Baseline* | 24 | 0.65 | **0.001** | |
| *at 3 months* | 22 | 0.51 | **0.018** | |
| *at 6 months* | 21 | 0.67 | **0.001** | |
| Abbreviations: **r**, Pearson correlation coefficient; **r2**, Coefficient of determination; **RYGB**, Roux-en-Y gastric bypass. | | | | |  | |

Supplementary Table : Results of Kendall’s Tau for Energy Intake from the Four Stimuli and Their Reported Liking in the Study Group with Normal Weight.

The table presents the results of the Kendall’s tau for energy intake from each of the four stimuli and their reported liking in the study group with normal weight. For each time frame, the table reports the number of complete cases (N), the Kendall’s tau (τ), and p-values (Pr(>|t|)). Missing values (reported with “-“) mean that, for the relative time point, there was no energy intake for the relative stimulus by any of the individuals of the study group.

| **Group** | **Energy**  **Intake** | **N** | **Kendall’s τ** | **Pr(>|t|)** | |
| --- | --- | --- | --- | --- | --- |
| **HF-HS** | *at Baseline* | 11 | 0.64 | **0.035** | |
| *at 3 months* | 11 | - | - | |
| *at 6 months* | 11 | 0.69 | **0.019** | |
| *at 12 months* | 10 | 0.79 | **0.004** | |
| **HF-LS** | *at Baseline* | 11 | 0.85 | **0.002** | |
| *at 3 months* | 11 | 0.68 | **0.021** | |
| *at 6 months* | 11 | - | - | |
| *at 12 months* | 10 | 0.20 | 0.565 | |
| **LF-HS** | *at Baseline* | 11 | 0.59 | 0.054 | |
| *at 3 months* | 11 | 0.25 | 0.480 | |
| *at 6 months* | 11 | 0.64 | **0.034** | |
| *at 12 months* | 10 | - | - | |
| **LF-LS** | *at Baseline* | 11 | 0.70 | **0.017** | |
| *at 3 months* | 11 | 0.59 | 0.057 | |
| *at 6 months* | 11 | 0.83 | **0.003** | |
| *at 12 months* | 10 | 0.76 | **0.007** | |
| Abbreviations: **r**, Pearson correlation coefficient; **r2**, Coefficient of determination; **RYGB**, Roux-en-Y gastric bypass. | | | | |  | |

# Perception of Amount Consumed

Supplementary Table : Average of Differences Between Guessed Consumption and Volume Consumed During the Drinkometer Test for the Three Study Groups.

The table presents the average of differences between guessed consumption and volume consumed during the drinkometer test for the three study groups (RYGB, obesity, and normal weight).

|  | **Cohort** | | |
| --- | --- | --- | --- |
|  | **RYGB***  N = 23 | **Obesity***  N = 24 | **Normal-Weight***  N = 11 |
| **Difference Between**  **Guessed Consumption**  **and**  **Volume Consumed** | +11.5 %  (from 2.2 to 25.1) | –11.6  (from –23.7 to 0.4) | +22.9 %  (from 1.5 to 44.2) |
| Abbreviations: **RYGB**, Roux-en-Y Gastric Bypass.  *** Mean (from lower CI to upper CI). CI, 95 % confidence interval. | | | |

Supplementary Table : Differences Between Guessed Consumption and Volume Consumed During the Drinkometer Test for the Three Study Groups Throughout the Study Period.

The table presents the differences between guessed consumption and volume consumed during the drinkometer test for the three study groups (RYGB, obesity, and normal weight) throughout the study period.

|  | **Cohort** | | |
| --- | --- | --- | --- |
|  | **RYGB***  N = 23 | **Obesity***  N = 24 | **Normal-Weight***  N = 11 |
| **Baseline** | +31.3 %  (from +1.8 to +60.9) | –3.7 %  (from –21.9 to +14.5) | 36.5 %  (from –16.6 to +89.7) |
| **1 month** | +12.4 %  (from –17.9 to +42.7) | - | - |
| **3 months** | +7.4 %  (from –29.4 to +44.2) | –22.7 %  (from –46.8 to +1.3) | 43.6 %  (from –17.6 to +104.9) |
| **6 months** | –12.5 %  (from –42.7 to +17.7) | –9.3 %  (from –32.4 to +13.9) | 1.1 %  (from –30.0 to +32.1) |
| **12 months** | - 1. %   (from –19.4 to +46.0) | - | 6.8 %  (from –25.2 to +38.8) |
| Abbreviations: **RYGB**, Roux-en-Y Gastric Bypass.  *** Mean (from lower CI to upper CI). CI, 95 % confidence interval. | | | |

Supplementary Table 72: Results of Linear Correlation Analysis for Guessed Consumption and Volume Consumed During the Drinkometer Test in the Three Study Groups.

The table presents the results of the linear correlation analysis for guessed consumption and volume consumed during the drinkometer test in the three study groups (RYGB, Obesity, and Normal Weight) throughout the follow-up period. For each time frame, the table reports the number of complete cases (N), the Pearson correlation coefficients (r), p-values (Pr(>|t|)), and confidence intervals of the coefficient (lower and upper 95% CI). The r-squared (r²) value, or coefficient of determination, represents the proportion of the variance in the dependent variable that is explained by the independent variables in the model.

| **Group** | **Energy**  **Intake** | **N** | ***r*** | **Pr(>|t|)** | ***r2*** | |
| --- | --- | --- | --- | --- | --- | --- |
| **RYGB** | *at Baseline* | 23 | 0.69 | **<0.001** | 47.7% | |
| *at 1 month* | 19 | 0.51 | **0.027** | 25.7% | |
| *at 3 months* | 21 | 0.43 | 0.059 | 18.4% | |
| *at 6 months* | 19 | 0.43 | 0.076 | 18.4% | |
| *at 12 months* | 20 | 0.72 | **<0.001** | 52.0% | |
| **Obesity** | *at Baseline* | 24 | 0.70 | **<0.001** | 48.8% | |
| *at 3 months* | 22 | 0.54 | **0.011** | 29.5% | |
| *at 6 months* | 21 | 0.59 | **0.005** | 34.8% | |
| **Normal Weight** | *at Baseline* | 11 | 0.64 | **0.033** | 41.3% | |
| *at 3 months* | 11 | 0.32 | 0.334 | 10.4% | |
| *at 6 months* | 11 | 0.59 | **0.036** | 34.5% | |
| *at 12 months* | 10 | 0.44 | 0.204 | 19.3% | |
| Abbreviations: **r**, Pearson correlation coefficient; **r2**, Coefficient of determination; **RYGB**, Roux-en-Y gastric bypass. | | | | | |  | |

Supplementary Table 73: Bland-Altman Analysis for Agreement Between Guessed Consumption and Volume Consumed During the Drinkometer Test in the Three Study Groups.

The table presents the results of the Bland-Altman analysis for agreement between guessed consumption and volume consumed during the drinkometer test in the three study groups (RYGB, Obesity, and Normal Weight) throughout the follow-up period. For each time frame, the table reports the number of complete cases (N), the bias of agreement (bias), and the lower and upper limits of agreement (LoA).

| **Group** | **Energy**  **Intake** | **N** | ***bias*** | **Lower LoA** | **Upper LoA** | |
| --- | --- | --- | --- | --- | --- | --- |
| **RYGB** | *at Baseline* | 23 | 8.9 | -355.8 | 373.7 | |
| *at 1 month* | 19 | 1.6 | -143.9 | 147.1 | |
| *at 3 months* | 21 | -7.4 | -224.6 | 209.9 | |
| *at 6 months* | 19 | -27.5 | -272.0 | 216.9 | |
| *at 12 months* | 20 | 24.0 | -209.3 | 257.4 | |
| **Obesity** | *at Baseline* | 24 | -77.0 | -463.8 | 309.8 | |
| *at 3 months* | 22 | -212.2 | -685.0 | 260.6 | |
| *at 6 months* | 21 | -97.4 | -523.6 | 328.7 | |
| **Normal Weight** | *at Baseline* | 11 | 98.2 | -371.0 | 567.4 | |
| *at 3 months* | 11 | 125.2 | -538.1 | 788.6 | |
| *at 6 months* | 11 | -48.9 | -463.3 | 365.5 | |
| *at 12 months* | 10 | -3.8 | -425.1 | 417.4 | |
| Abbreviations: **LoA**, limits of agreement; **RYGB**, Roux-en-Y gastric bypass. | | | | | |  | |

# Appetite

Supplementary Table 74: Summary Statistics of appetite sensations reported with a 100-mm visual analogue scale by the study group undergoing Roux-en-Y Gastric Bypass (RYGB) surgery over the study period. The months refer to the number of months after RYGB surgery and not after the baseline measurement.

| **VAS ratings** | **Prandial time** | **RYGB** | | | | |
| --- | --- | --- | --- | --- | --- | --- |
| **Baseline***  N = 23 | **1 month***  N = 19 | **3 months***  N = 21 | **6 months***  N = 19 | **12 months***  N = 20 |
| **Hunger** | **before** | 50.04  (27.51) | 23.14  (26.94) | 21.29  (25.79) | 33.00  (33.54) | 29.85  (30.01) |
| **after** | 8.09  (7.08) | 3.05  (5.52) | 5.10  (9.34) | 6.05  (11.21) | 5.70  (9.05) |
| **30 min after** | 17.00  (20.36) | 3.33  (5.58) | 4.38  (5.14) | 5.90  (7.17) | 9.80  (12.00) |
| **Desire To Eat** | **before** | 44.78  (25.79) | 23.14  (28.95) | 25.90  (28.58) | 25.90  (24.06) | 31.95  (31.07) |
| **after** | 7.65  (7.21) | 2.14  (2.85) | 2.52  (2.96) | 6.25  (12.07) | 5.65  (10.19) |
| **30 min after** | 14.78  (17.88) | 2.86  (3.64) | 5.00  (7.84) | 5.50  (8.80) | 11.45  (16.20) |
| **Thirst** | **before** | 57.48  (28.03) | 43.52  (33.86) | 38.67  (27.16) | 41.10  (28.26) | 40.65  (31.80) |
| **after** | 12.22  (14.66) | 6.29  (9.67) | 8.24  (15.40) | 7.50  (12.81) | 8.75  (14.53) |
| **30 min after** | 20.78  (23.40) | 8.38  (10.97) | 14.52  (17.60) | 13.45  (17.45) | 12.45  (14.31) |
| **Fullness** | **before** | 27.04  (18.00) | 43.76  (31.77) | 25.57  (25.44) | 26.55  (27.04) | 29.85  (30.16) |
| **after** | 87.04  (12.90) | 81.05  (30.62) | 82.90  (16.57) | 82.50  (23.67) | 86.65  (15.37) |
| **30 min after** | 77.70  (20.83) | 79.00  (31.58) | 85.90  (20.26) | 66.90  (36.72) | 75.10  (28.26) |
| Abbreviations: **RYGB**, Roux-en-Y Gastric Bypass.  *** Mean (SD). SD, standard deviation. | | | | | | |

Supplementary Table 75: Summary Statistics of appetite sensations reported with a 100-mm visual analogue scale by the study group with obesity over the study period. The months refer to the number of months after the baseline measurement.

| **VAS ratings** | **Prandial time** | **Obesity** | | | | |
| --- | --- | --- | --- | --- | --- | --- |
| **Baseline***  N = 23 | **1 month***  N = 19 | **3 months***  N = 21 | **6 months***  N = 19 | **12 months***  N = 20 |
| **Hunger** | **before** | 61.04  (20.65) | - | 70.75  (18.52) | 73.48  (20.16) | - |
| **after** | 9.39  (19.31) | - | 12.65  (20.08) | 13.38  (14.20) | - |
| **30 min after** | 16.00 | - | 16.30  (19.44) | 17.62  (18.05) | - |
| **Desire To Eat** | **before** | 59.22  (24.42) | - | 68.90  (21.76) | 70.86  (20.68) | - |
| **after** | 15.30  (22.96) | - | 21.90  (28.84) | 20.14  (22.56) | - |
| **30 min after** | 14.35  (16.47) | - | 25.30  (29.31) | 25.95  (25.45) | - |
| **Thirst** | **before** | 33.52  (31.49) | - | 33.15  (29.86) | 37.00  (32.46) | - |
| **after** | 27.43  (28.33) | - | 33.80  (33.39) | 25.14  (26.09) | - |
| **30 min after** | 33.52  (31.49) | - | 33.15  (29.86) | 37.00  (32.46) | - |
| **Fullness** | **before** | 25.61  (18.28) | - | 26.85  (21.70) | 21.24  (16.36) | - |
| **after** | 86.00  (14.44) | - | 85.55  (16.27) | 77.71  (24.04) | - |
| **30 min after** | 74.26  (26.76) | - | 69.90  (29.44) | 65.52  (27.08) | - |
| Abbreviations: **RYGB**, Roux-en-Y Gastric Bypass.  *** Mean (SD). SD, standard deviation. | | | | | | |

Supplementary Table 76: Summary Statistics of appetite sensations reported with a 100-mm visual analogue scale by the study group with normal weight over the study period. The months refer to the number of months after the baseline measurement.

| **VAS ratings** | **Prandial time** | **Normal Weight** | | | | |
| --- | --- | --- | --- | --- | --- | --- |
| **Baseline***  N = 23 | **1 month***  N = 19 | **3 months***  N = 21 | **6 months***  N = 19 | **12 months***  N = 20 |
| **Hunger** | **before** | 68.20  (25.22) | - | 79.64  (16.16) | 82.64  (13.20) | 84.20  (11.27) |
| **after** | 11.70  (16.17) | - | 13.55  (20.69) | 9.27  (7.07) | 14.00  (20.02) |
| **30 min after** | 17.80  (18.38) | - | 14.64  (12.56) | 19.55  (16.48) | 9.40  (8.81) |
| **Desire To Eat** | **before** | 77.00  (21.78) | - | 81.18  (20.31) | 81.09  (18.36) | 85.33  (10.54) |
| **after** | 15.30  (22.96) | - | 21.90  (28.84) | 20.14  (22.56) | 20.14  (22.56) |
| **30 min after** | 27.40  (23.35) | - | 38.18  (31.81) | 42.45  (24.41) | 38.44  (36.10) |
| **Thirst** | **before** | 67.09  (26.82) | - | 65.64  (27.71) | 77.00  (24.21) | 68.00  (30.96) |
| **after** | 30.73  (25.86) | - | 37.00  (32.39) | 40.73  (32.18) | 33.50  (27.51) |
| **30 min after** | 48.18  (27.25) | - | 40.45  (29.32) | 43.27  (26.66) | 41.10  (33.18) |
| **Fullness** | **before** | 11.55  (18.04) | - | 13.45  (14.58) | 13.91  (13.66) | 16.11  (18.02) |
| **after** | 77.55  (31.75) | - | 87.64  (9.41) | 90.64  (6.10) | 79.00  (28.39) |
| **30 min after** | 74.18  (18.69) | - | 67.91  (21.87) | 70.00  (24.12) | 75.78  (16.00) |
| Abbreviations: **RYGB**, Roux-en-Y Gastric Bypass.  *** Mean (SD). SD, standard deviation. | | | | | | |

***Supplementary Table 77: Significant Pairwise Comparisons of Hunger Between Baseline and Follow-up Time Points Between Cohorts.***

The table presents the statistically significant estimated differences in hunger between baseline and the follow-up time points (1 month, 3 months, 6 months, and 12 months) between the three study groups (Obesity, Normal-Weight, and RYGB). The estimates are derived from a linear mixed model (LMM) with pairwise comparisons performed using estimated marginal means (EMM). The LMM was built with an interaction term between cohort and time point. Significant differences are reported with their corresponding standard errors (SE), degrees of freedom (DF), confidence intervals (lower 95% CI, upper 95% CI), t-ratios, and p-values. The standard errors were estimated using the ordinary least squares (OLS) method, which calculates the variability of the coefficient estimates and residuals by minimizing the sum of the squared differences between the observed and predicted values.

|  | Estimate | SE | DF | Lower  95% CI | Upper  95% CI | t-ratio | p-value |
| --- | --- | --- | --- | --- | --- | --- | --- |
| **Hunger before** |  |  |  |  |  |  |  |
| *RYGB 1 month*  *vs*  *Obesity 1 month* | –37.42 | 7.17 | 190.62 | –62.07 | –12.78 | –5.219 | **<0.001** |
| *RYGB 1 month*  *vs*  *Normal Weight 1 month* | –43.98 | 9.09 | 196.21 | –75.21 | –12.75 | –4.838 | **<0.001** |
| *RYGB 3 months*  *vs*  *Obesity 3 months* | –47.28 | 7.38 | 198.19 | –72.64 | –21.93 | –6.405 | **<0.001** |
| *RYGB 3 months*  *vs*  *Normal Weight 3 months* | –57.22 | 8.85 | 189.50 | –87.62 | –26.82 | –6.468 | **<0.001** |
| *RYGB 6 months*  *vs*  *Obesity 6 months* | –39.77 | 7.39 | 197.60 | –65.15 | –14.40 | –5.383 | **<0.001** |
| *RYGB 6 months*  *vs*  *Normal Weight 6 months* | –49.46 | 8.91 | 191.12 | –80.09 | –18.83 | –5.549 | **<0.001** |
| *RYGB 12 months*  *vs*  *Obesity 12 months* | –42.92 | 7.39 | 197.60 | –68.30 | –17.55 | –5.810 | **<0.001** |
| *RYGB 12 months*  *vs*  *Normal Weight 12 months* | –55.80 | 9.15 | 198.31 | –87.21 | –24.38 | –6.100 | **<0.001** |
| Abbreviations: **CI**, confidence interval; **DF**, degrees of freedom; **RYGB**, Roux-en-Y Gastric Bypass; **SE**, standard error. | | | | | | | |

***Supplementary Table 78: Significant Pairwise Comparisons of Desire To Eat Between Baseline and Follow-up Time Points Between Cohorts.***

The table presents the statistically significant estimated differences in desire to eat between baseline and the follow-up time points (1 month, 3 months, 6 months, and 12 months) between the three study groups (Obesity, Normal-Weight, and RYGB). The estimates are derived from a linear mixed model (LMM) with pairwise comparisons performed using estimated marginal means (EMM). The LMM was built with an interaction term between cohort and time point. Significant differences are reported with their corresponding standard errors (SE), degrees of freedom (DF), confidence intervals (lower 95% CI, upper 95% CI), t-ratios, and p-values. The standard errors were estimated using the ordinary least squares (OLS) method, which calculates the variability of the coefficient estimates and residuals by minimizing the sum of the squared differences between the observed and predicted values.

|  | Estimate | SE | DF | Lower  95% CI | Upper  95% CI | t-ratio | p-value |
| --- | --- | --- | --- | --- | --- | --- | --- |
| **Desire To Eat before** |  |  |  |  |  |  |  |
| *RYGB 1 Baseline*  *vs*  *Normal Weight 1 Baseline* | –32.71 | 9.19 | 196.99 | –64.29 | –1.13 | –3.558 | **0.034** |
| *RYGB 1 month*  *vs*  *Obesity 1 month* | –36.52 | 7.34 | 193.82 | –61.75 | –11.29 | –4.973 | **<0.001** |
| *RYGB 1 month*  *vs*  *Normal Weight 1 month* | –54.80 | 9.31 | 199.22 | –86.79 | –22.81 | –5.884 | **<0.001** |
| *RYGB 3 months*  *vs*  *Obesity 3 months* | –41.35 | 7.56 | 201.13 | –67.32 | –15.37 | –5.467 | **<0.001** |
| *RYGB 3 months*  *vs*  *Normal Weight 3 months* | –54.64 | 9.06 | 192.78 | –85.77 | –23.51 | –6.031 | **<0.001** |
| *RYGB 6 months*  *vs*  *Obesity 6 months* | –45.39 | 7.57 | 200.52 | –71.39 | –19.39 | –5.996 | **<0.001** |
| *RYGB 6 months*  *vs*  *Normal Weight 6 months* | –56.32 | 9.13 | 194.33 | –87.68 | –24.95 | –6.169 | **<0.001** |
| *RYGB 12 months*  *vs*  *Obesity 12 months* | –39.34 | 7.57 | 200.52 | –65.34 | –13.34 | –5.197 | **<0.001** |
| *RYGB 12 months*  *vs*  *Normal Weight 12 months* | –53.73 | 9.66 | 208.68 | –86.89 | –20.57 | –5.562 | **<0.001** |
| **Desire To Eat 30 min after** |  |  |  |  |  |  |  |
| *RYGB 3 months*  *vs*  *Normal Weight 3 months* | –32.40 | 7.77 | 136.93 | –59.22 | –5.57 | -4.172 | **0.005** |
| *RYGB 6 months*  *vs*  *Normal Weight 6 months* | –35.98 | 7.81 | 138.82 | –62.97 | –9.00 | -4.605 | **0.001** |
| Abbreviations: **CI**, confidence interval; **DF**, degrees of freedom; **RYGB**, Roux-en-Y Gastric Bypass; **SE**, standard error. | | | | | | | |

Supplementary Table 79: Summary Statistics of Satiety Quotient (Composite of Hunger and Desire To Eat) of the Three Study Groups Over the Study Period. The Months Refer to the Number of Months After RYGB Surgery for the Group Undergoing Roux-en-Y Gastric Bypass (RYGB) Surgery and After the Baseline Measurement for the Groups With Obesity and Normal Weight.

|  | **Cohort** | | |
| --- | --- | --- | --- |
|  | **RYGB***  N = 23 | **Obesity***  N = 24 | **Normal-Weight***  N = 11 |
| **Hunger** |  |  |  |
| *Baseline* | 0.11 ± 0.13 | 0.11 ± 0.09 | 0.14 ± 0.14 |
| *1 month* | 0.13 ± 0.15 | - | - |
| *3 months* | 0.10 ± 0.18 | 0.12 ± 0.18 | 0.13 ± 0.05 |
| *6 months* | 0.15 ± 0.20 | 0.10 ± 0.06 | 0.10 ± 0.03 |
| *12 months* | 0.06 ± 0.16 | - | 0.12 ± 0.06 |
| **Desire To Eat** |  |  |  |
| *Baseline* | 0.10 ± 0.12 | 0.11 ± 0.08 | 0.12 ± 0.10 |
| *1 month* | 0.14 ± 0.17 | - | - |
| *3 months* | 0.12 ± 0.21 | 0.12 ± 0.24 | 0.08 ± 0.06 |
| *6 months* | 0.10 ± 0.13 | 0.08 ± 0.08 | 0.07 ± 0.06 |
| *12 months* | 0.06 ± 0.10 | - | 0.06 ± 0.06 |
| **Composite** |  |  |  |
| *Baseline* | 0.11 ± 0.11 | 0.11 ± 0.08 | 0.13 ± 0.12 |
| *1 month* | 0.14 ± 0.14 | - | - |
| *3 months* | 0.11 ± 0.19 | 0.12 ± 0.21 | 0.10 ± 0.05 |
| *6 months* | 0.13 ± 0.14 | 0.09 ± 0.07 | 0.08 ± 0.04 |
| *12 months* | 0.06 ± 0.12 | - | 0.08 ± 0.03 |
| Abbreviations: **RYGB**, Roux-en-Y Gastric Bypass.  *** Mean ± SD. SD, standard deviation. | | | |

Supplementary Table 80: Summary Statistics of postprandial decrease in appetite sensations of the three study groups over the study period. The months refer to the number of months after RYGB surgery for the group undergoing Roux-en-Y Gastric Bypass (RYGB) surgery and after the baseline measurement for the groups with obesity and normal weight.

|  | **Cohort** | | |
| --- | --- | --- | --- |
|  | **RYGB***  N = 23 | **Obesity***  N = 24 | **Normal-Weight***  N = 11 |
| **Hunger** |  |  |  |
| *Baseline* | –41.96 ± 26.04 | –51.65 ± 25.41 | –56.50 ± 24.72 |
| *1 month* | –20.10 ± 25.83 | - | - |
| *3 months* | –16.19 ± 22.93 | –58.10 ± 27.38 | –66.09 ± 20.37 |
| *6 months* | –26.95 ± 27.44 | –60.10 ± 19.59 | –73.36 ± 12.94 |
| *12 months* | –24.15 ± 31.50 | - | –70.20 ± 21.45 |
| **Desire To Eat** |  |  |  |
| *Baseline* | –37.13 ± 26.90 | –43.91 ± 26.71 | –47.50 ± 31.38 |
| *1 month* | –21.00 ± 28.85 | - | - |
| *3 months* | –23.38 ± 26.90 | –47.00 ± 41.07 | –51.18 ± 25.08 |
| *6 months* | –19.65 ± 16.74 | –50.71 ± 24.79 | –53.91 ± 26.69 |
| *12 months* | –26.30 ± 26.96 | - | –47.50 ± 31.38 |
| Abbreviations: **RYGB**, Roux-en-Y Gastric Bypass.  *** Mean ± SD. SD, standard deviation. | | | |

***Supplementary Table 81: Significant Pairwise Comparisons of Postprandial Decrease in Appetite Sensations Between Baseline and Follow-up Time Points Between Cohorts.***

The table presents the statistically significant estimated differences in postprandial decrease in appetite sensations (hunger and desire to eat) between baseline and the follow-up time points (1 month, 3 months, 6 months, and 12 months) between the three study groups (Obesity, Normal-Weight, and RYGB). The estimates are derived from a linear mixed model (LMM) with pairwise comparisons performed using estimated marginal means (EMM). The LMM was built with an interaction term between cohort and time point. Significant differences are reported with their corresponding standard errors (SE), degrees of freedom (DF), confidence intervals (lower 95% CI, upper 95% CI), t-ratios, and p-values. The standard errors were estimated using the ordinary least squares (OLS) method, which calculates the variability of the coefficient estimates and residuals by minimizing the sum of the squared differences between the observed and predicted values.

|  | Estimate | SE | DF | Lower  95% CI | Upper  95% CI | t-ratio | p-value |
| --- | --- | --- | --- | --- | --- | --- | --- |
| **Hunger** |  |  |  |  |  |  |  |
| *RYGB 1 month*  *vs*  *Obesity Baseline* | 31.17 | 7.46 | 189.67 | 5.53 | 56.81 | 4.179 | **0.004** |
| *RYGB 1 month*  *vs*  *Normal Weight Baseline* | 35.30 | 9.46 | 195.29 | 2.81 | 67.79 | 3.733 | **0.019** |
| *RYGB 3 months*  *vs*  *Obesity 3 months* | 38.58 | 7.68 | 197.29 | 12.20 | 64.96 | 5.024 | **< 0.001** |
| *RYGB 3 months*  *vs*  *Normal Weight 3 months* | 49.06 | 9.20 | 188.53 | 17.42 | 80.69 | 5.330 | **< 0.001** |
| *RYGB 6 months*  *vs*  *Obesity 6 months* | 30.87 | 7.69 | 196.71 | 4.46 | 57.27 | 4.016 | **0.007** |
| *RYGB 6 months*  *vs*  *Normal Weight 6 months* | 46.20 | 9.27 | 190.17 | 14.33 | 78.07 | 4.982 | **< 0.001** |
| *RYGB 12 months*  *vs*  *Obesity 12 months* | 33.67 | 7.69 | 196.71 | 7.26 | 60.07 | 4.380 | **0.002** |
| *RYGB 12 months*  *vs*  *Normal Weight 12 months* | 45.33 | 9.52 | 197.40 | 12.65 | 78.02 | 4.764 | **< 0.001** |
| **Desire To Eat** |  |  |  |  |  |  |  |
| *RYGB 1 month*  *vs*  *Normal Weight 1 month* | 27.85 | 7.42 | 53.47 | 1.47 | 54.23 | 3.752 | **0.029** |
| *RYGB 3 months*  *vs*  *Normal Weight 3 months* | 27.85 | 7.42 | 53.47 | 1.47 | 54.23 | 3.752 | **0.029** |
| *RYGB 6 months*  *vs*  *Normal Weight 6 months* | 27.85 | 7.42 | 53.47 | 1.47 | 54.23 | 3.752 | **0.029** |
| *RYGB 12 months*  *vs*  *Normal Weight 12 months* | 27.85 | 7.42 | 53.47 | 1.47 | 54.23 | 3.752 | **0.029** |
| Abbreviations: **CI**, confidence interval; **DF**, degrees of freedom; **RYGB**, Roux-en-Y Gastric Bypass; **SE**, standard error. | | | | | | | |

Supplementary Table 82: Results of Partial Correlation Analysis for Postprandial Decrease in Hunger and Energy Intake During the Drinkometer Test in the Three Study Groups.

The table presents the results of the partial correlation analysis for postprandial decrease in hunger and energy intake during the drinkometer test adjusted for Basal Metabolic Rate (BMR) in the three study groups (Obesity, Normal Weight, and RYGB). The partial correlations were calculated by fitting linear models to control for BMR, extracting the residuals, and computing the correlation of these residuals. For each time frame, the table reports the number of complete cases (N), the partial correlation coefficients (partial r), and p-values (Pr(>|t|)). The standard errors and residual standard errors were estimated using the ordinary least squares (OLS) method, which calculates the variability of the coefficient estimates and residuals by minimizing the sum of the squared differences between the observed and predicted values. The adjusted r-squared (r²) value, or coefficient of determination, represents the proportion of the variance in the dependent variable that is explained by the independent variables in the model.

| **Group** | **Energy**  **Intake** | **N** | ***r*** | **Pr(>|t|)** | ***r2*** | |
| --- | --- | --- | --- | --- | --- | --- |
| **RYGB** | *at Baseline* | 23 | –0.54 | **0.008** | 29.4% | |
| *at 1 month* | 19 | –0.28 | 0.242 | 7.9% | |
| *at 3 months* | 21 | 0.07 | 0.751 | 0.5% | |
| *at 6 months* | 19 | –0.03 | 0.893 | 0.1% | |
| *at 12 months* | 20 | –0.63 | **0.003** | 40.0% | |
| **Obesity** | *at Baseline* | 24 | –0.06 | 0.776 | 0.4% | |
| *at 3 months* | 22 | –0.51 | 0.023 | 25.6% | |
| *at 6 months* | 21 | –0.33 | 0.147 | 10.7% | |
| **Normal Weight** | *at Baseline* | 11 | 0.50 | 0.145 | 24.6% | |
| *at 3 months* | 11 | 0.00 | 1.000 | 0.0% | |
| *at 6 months* | 11 | 0.40 | 0.258 | 15.6% | |
| *at 12 months* | 10 | –0.19 | 0.606 | 3.5% | |
| Abbreviations: **r**, Pearson correlation coefficient; **r2**, Coefficient of determination; **RYGB**, Roux-en-Y gastric bypass. | | | | | |  | |

Supplementary Table 83: Results of Partial Correlation Analysis for Postprandial Decrease in Desire To Eat and Energy Intake During the Drinkometer Test in the Three Study Groups.

The table presents the results of the partial correlation analysis for postprandial decrease in desire to eat and energy intake during the drinkometer test adjusted for Basal Metabolic Rate (BMR) in the three study groups (Obesity, Normal Weight, and RYGB). The partial correlations were calculated by fitting linear models to control for BMR, extracting the residuals, and computing the correlation of these residuals. For each time frame, the table reports the number of complete cases (N), the partial correlation coefficients (partial r), and p-values (Pr(>|t|)). The standard errors and residual standard errors were estimated using the ordinary least squares (OLS) method, which calculates the variability of the coefficient estimates and residuals by minimizing the sum of the squared differences between the observed and predicted values. The adjusted r-squared (r²) value, or coefficient of determination, represents the proportion of the variance in the dependent variable that is explained by the independent variables in the model.

| **Group** | **Energy**  **Intake** | **N** | ***r*** | **Pr(>|t|)** | ***r2*** | |
| --- | --- | --- | --- | --- | --- | --- |
| **RYGB** | *at Baseline* | 23 | –0.33 | 0.119 | 11.1% | |
| *at 1 month* | 19 | –0.09 | 0.718 | 0.8% | |
| *at 3 months* | 21 | –0.04 | 0.874 | 0.1% | |
| *at 6 months* | 19 | –0.25 | 0.300 | 6.3% | |
| *at 12 months* | 20 | –0.64 | **0.003** | 40.5% | |
| **Obesity** | *at Baseline* | 24 | 0.03 | 0.894 | 0.1% | |
| *at 3 months* | 22 | –0.08 | 0.738 | 0.6% | |
| *at 6 months* | 21 | –0.14 | 0.531 | 2.1% | |
| **Normal Weight** | *at Baseline* | 11 | –0.28 | 0.432 | 7.9% | |
| *at 3 months* | 11 | –0.36 | 0.273 | 13.2% | |
| *at 6 months* | 11 | 0.19 | 0.604 | 3.5% | |
| *at 12 months* | 10 | –0.69 | **0.038** | 48.3% | |
| Abbreviations: **r**, Pearson correlation coefficient; **r2**, Coefficient of determination; **RYGB**, Roux-en-Y gastric bypass. | | | | | |  | |
